1  
2  
3  
4  
5  
6  
7  
8  
9  
10  
11  
12  
13  
14  
15  
16  
17  
18  
19  
20  
21  
22  
23  
24

## **Drivers of genetic diversity in secondary metabolic gene clusters within a fungal species**

Abigail L. Lind<sup>1‡</sup>, Jennifer H. Wisecaver<sup>2</sup>, Catarina Lameiras<sup>3</sup>, Philipp Wiemann<sup>4§</sup>, Jonathan M. Palmer<sup>5</sup>, Nancy P. Keller<sup>4</sup>, Fernando Rodrigues<sup>6,7</sup>, Gustavo H. Goldman<sup>8</sup>, Antonis Rokas<sup>1,2†</sup>

*1. Department of Biomedical Informatics, Vanderbilt University School of Medicine, Nashville, Tennessee, USA*

*2. Department of Biological Sciences, Vanderbilt University, Nashville, Tennessee, USA*

*3. Department of Microbiology, Portuguese Oncology Institute of Porto, Porto, Portugal*

*4. Department of Medical Microbiology & Immunology, University of Wisconsin-Madison, Madison, Wisconsin, USA*

*5. Center for Forest Mycology Research, Northern Research Station, US Forest Service, Madison, Wisconsin, USA*

*6. Life and Health Sciences Research Institute (ICVS), School of Medicine, University of Minho, Braga, Portugal*

*7. ICVS/3B's - PT Government Associate Laboratory, Braga/Guimarães, Portugal.*

*8. Faculdade de Ciências Farmacêuticas de Ribeirão Preto, Universidade de São Paulo, São Paulo, Brazil*

†Corresponding author and lead contact: [antonis.rokas@vanderbilt.edu](mailto:antonis.rokas@vanderbilt.edu)

‡Current address: Gladstone Institutes, San Francisco, California, USA

§Current address: Hexagon Bio, Menlo Park, California, USA

## 25 **Summary**

26  
27 Filamentous fungi produce a diverse array of secondary metabolites (SMs) critical for defense,  
28 virulence, and communication. The metabolic pathways that produce SMs are found in  
29 contiguous gene clusters in fungal genomes, an atypical arrangement for metabolic pathways in  
30 other eukaryotes. Comparative studies of filamentous fungal species have shown that SM gene  
31 clusters are often either highly divergent or uniquely present in one or a handful of species,  
32 hampering efforts to determine the genetic basis and evolutionary drivers of SM gene cluster  
33 divergence. Here we examined SM variation in 66 cosmopolitan strains of a single species, the  
34 opportunistic human pathogen *Aspergillus fumigatus*. Investigation of genome-wide within-  
35 species variation revealed five general types of variation in SM gene clusters: non-functional  
36 gene polymorphisms, gene gain and loss polymorphisms, whole cluster gain and loss  
37 polymorphisms, allelic polymorphisms where different alleles corresponded to distinct, non-  
38 homologous clusters, and location polymorphisms in which a cluster was found to differ in its  
39 genomic location across strains. These polymorphisms affect the function of representative *A.*  
40 *fumigatus* SM gene clusters, such as those involved in the production of gliotoxin,  
41 fumigaclavine, and helvolic acid, as well as the function of clusters with undefined products. In  
42 addition to enabling the identification of polymorphisms whose detection requires extensive  
43 genome-wide synteny conservation (e.g., mobile gene clusters and non-homologous cluster  
44 alleles), our approach also implicated multiple underlying genetic drivers, including point  
45 mutations, recombination, genomic deletion and insertion events, as well as horizontal gene  
46 transfer from distant fungi. Finally, most of the variants that we uncover within *A. fumigatus*  
47 have been previously hypothesized to contribute to SM gene cluster diversity across entire  
48 fungal classes and phyla. We suggest that the drivers of genetic diversity operating within a  
49 fungal species shown here are sufficient to explain SM cluster macroevolutionary patterns.

50

51 **Keywords:** chemodiversity, specialized metabolism, genome evolution, genome architecture,  
52 gene loss, genomic rearrangement

## 53 Introduction

54 Filamentous fungi produce a diverse array of small molecules that function as toxins,  
55 antibiotics, and pigments [1]. Though by definition these so-called specialized or secondary  
56 metabolites (SMs) are not strictly necessary for growth and development, they are critical to  
57 the lifestyle of filamentous fungi [2]. For example, antibiotic SMs give their fungal producers a  
58 competitive edge in environments crowded with other microbes [3]. SMs can additionally  
59 mediate communication between and within species, as well as contribute to virulence on  
60 animal and plant hosts in pathogenic fungi [4,5].

61  
62 A genomic hallmark of SMs in filamentous fungi is that the biosynthetic pathways that  
63 produce them are typically organized into contiguous gene clusters in the genome [6]. These  
64 gene clusters contain the chemical backbone synthesis genes whose enzymatic products  
65 produce a core metabolite, such as non-ribosomal peptide synthases (NRPS) and polyketide  
66 synthases (PKS), tailoring enzymes that chemically modify the metabolite, transporters involved  
67 in product export, and often transcription factors that control the expression of the clustered  
68 genes [6]. These gene clusters also occasionally contain resistance genes that confer self-  
69 protection against reactive or toxic metabolites [6]. Filamentous fungal genomes, particularly  
70 those in the phylum Ascomycota [6], typically contain dozens of SM gene clusters. However,  
71 most individual SM gene clusters appear to be either species-specific or narrowly taxonomically  
72 distributed in only a handful of species [7,6]. SM gene clusters that are more broadly  
73 distributed show discontinuous taxonomic distributions and are often highly divergent between  
74 species. Consequently, the identity and total number of SM gene clusters can vary widely even  
75 between very closely related species whose genomes exhibit very high sequence and synteny  
76 conservation [8,9].

77  
78 In the last decade, several comparative studies have described macroevolutionary  
79 patterns of SM gene cluster diversity. For example, studies centered on genomic comparisons  
80 of closely related species have identified several different types of inter-species divergence,  
81 from single nucleotide substitutions (e.g., differences in fumonisins produced by *Fusarium*  
82 species are caused by variants in one gene [10]), to gene gain / loss events (e.g., the

83 trichothecene gene clusters in *Fusarium* species and the aflatoxin family SM gene clusters in  
84 *Aspergillus* species) [11–16], and genomic rearrangements (e.g., the trichothecene gene  
85 clusters in *Fusarium*) [11]. Additionally, genetic and genomic comparisons across fungal orders  
86 and classes have identified several instances of gene gain or loss [17–19] and horizontal gene  
87 transfer [13,20–23] acting on individual genes or on entire gene clusters, providing explanations  
88 for the diversity and discontinuity of the taxonomic distribution of certain SM gene clusters  
89 across fungal species.

90  
91         Although inter-species comparative studies have substantially contributed to our  
92 understanding of SM diversity, the high levels of evolutionary divergence of SM clusters make  
93 inference of the genetic drivers of SM gene cluster evolution challenging; put simply, it has  
94 been difficult to “catch” the mechanisms that generate SM gene cluster variation “in the act”.  
95 Several previous studies have examined intra-species or population-level differences in  
96 individual SM gene clusters, typically focusing on the presence and frequency of non-functional  
97 alleles of clusters involved in production of mycotoxins. Examples of clusters exhibiting such  
98 polymorphisms include the gibberellin gene cluster in *Fusarium oxysporum* [24], the fumonisin  
99 gene cluster in *Fusarium fujikuroi* [25], the aflatoxin and cyclopiazonic acid gene clusters in  
100 *Aspergillus flavus* [26], and the bikaverin gene cluster in *Botrytis cinerea* [27]. While these  
101 studies have greatly advanced our understanding of SM gene cluster genetic variation and  
102 highlighted the importance of within-species analyses, studies examining the entirety of SM  
103 gene cluster polymorphisms within fungal species are so far lacking. We currently do not know  
104 the types and frequency of SM gene cluster polymorphisms within fungal species, whether  
105 these polymorphisms affect all types of SM gene clusters, or the genetic drivers of SM gene  
106 cluster evolution.

107  
108         To address these questions, we investigated the genetic diversity of all 36 known and  
109 predicted SM gene clusters in whole genome sequence data from 66 strains, 8 of which were  
110 sequenced in this study, of the opportunistic human pathogen *Aspergillus fumigatus*, a species  
111 with cosmopolitan distribution and panmictic population structure [28]. We found that 13 SM

112 gene clusters were generally conserved and harbored low amounts of variation. In contrast, the  
113 remaining 23 SM gene clusters were highly variable and contained one or more of five different  
114 types of genetic variation: single-nucleotide polymorphisms including nonsense and frameshift  
115 variants, individual gene gain and loss polymorphisms, entire cluster gain and loss  
116 polymorphisms, polymorphisms associated with changes in cluster genomic location, and  
117 clusters with non-homologous alleles resembling the idiomorphs of fungal mating loci. Many  
118 clusters contained interesting combinations of these types of polymorphisms, such as  
119 pseudogenization in some strains and entire cluster loss in others. The types of variants we find  
120 are likely generated by a combination of DNA replication and repair errors, recombination,  
121 genomic insertions and deletions, and horizontal transfer. We additionally find an enrichment  
122 for transposable elements (TEs) around horizontally transferred clusters, clusters that change in  
123 genomic locations, and idiomorphic clusters. Taken together, our results provide a guide to  
124 both the types of polymorphisms and the genetic drivers of SM gene cluster diversification in  
125 filamentous fungi. As most of the genetic variants that we observe have been previously  
126 associated with SM gene cluster diversity across much larger evolutionary distances and  
127 timescales, we argue that processes influencing SM gene cluster diversity within species are  
128 sufficient to explain SM cluster macroevolutionary patterns.

129 **Results and Discussion**

130 We analyzed the genomes of 66 globally distributed strains of *Aspergillus fumigatus* for  
131 polymorphisms in SM gene clusters. We performed whole-genome sequencing on 8 strains, and  
132 collected the remaining 58 strains from publicly available databases including NCBI Genome  
133 and NCBI Short Read Archive (Figure 1, Table S1) [28–32]. All publicly available strains of *A.*  
134 *fumigatus* with sequencing data passing quality thresholds (see Methods) or with assembled  
135 genomes were included in our analysis. The resulting dataset contains strains sampled from 12  
136 sites world-wide and from clinical and environmental sources (Table S1).

137  
138 We analyzed all strains for polymorphisms in 33 curated SM gene clusters present in the  
139 reference Af293 genome, and additionally searched for novel SM gene clusters (see Methods).  
140 These examinations revealed five distinct types of polymorphisms in SM gene clusters (Figure 1,  
141 Table 1):

- 142 a) Single nucleotide and short indel polymorphisms. 33 / 33 SM gene clusters (present in  
143 the reference Af293 strain) contained multiple genes with missense SNPs and short  
144 indel variants in one or more strains. 23 / 33 SM gene clusters contained one or more  
145 genes with frameshift or nonsense variants.
- 146 b) Gene content polymorphisms involving loss or gain of one or more genes. 6 / 33 SM  
147 gene clusters contained a gene content polymorphism.
- 148 c) Whole SM gene cluster gain and loss polymorphisms. 3 / 33 SM gene clusters were  
149 entirely absent in one or more strains and an additional 3 previously unknown SM gene  
150 clusters were discovered.
- 151 d) Idiomorphic polymorphisms. One locus contained multiple non-homologous SM gene  
152 cluster alleles in different strains.
- 153 e) Genomic location polymorphisms. 2 / 33 SM gene clusters were found on different  
154 chromosomes between strains.

155  
156 Both genomic location polymorphisms and idiomorphic polymorphisms are novel types of  
157 variants that have not been previously described for secondary metabolic gene clusters, likely

158 because they can only be identified when genome-wide synteny and sequence conservation are  
159 high. The remaining types of variants, including single-nucleotide changes and gene gain and  
160 loss events, have been implicated at the species level as major drivers of secondary metabolic  
161 gene cluster evolution (Table 1), suggesting that the diversity-generating processes observed  
162 within a species are sufficient to explain SM gene cluster evolution across species.

163

#### 164 **Single-nucleotide and indel polymorphisms**

165 It is well established that single nucleotide polymorphisms (SNPs) and short indel  
166 polymorphisms, which are caused by errors in DNA replication and repair, are a major source of  
167 genomic variation [33]. Non-synonymous SNPs and indels with missense, frameshift, and  
168 nonsense effects were widespread across the 33 SM reference gene clusters (Figure 1, Table  
169 S2). Every strain contained numerous missense mutations and at least one nonsense or  
170 frameshift mutation in its SM gene clusters. Although missense mutations are likely to influence  
171 SM production, the functional effects of nonsense and frameshift mutations are comparatively  
172 easier to infer from genomic sequence data because they often result in truncated proteins and  
173 loss of protein function.

174

175 SNPs and short indel polymorphisms can affect secondary metabolite production, as in  
176 the case of the lack of tryptacidin production in the A1163 strain because of a previously  
177 identified frameshift mutation in the polyketide synthase (PKS) of the tryptacidin gene cluster  
178 [34]. Interestingly, we identified a premature stop codon (Gln273\*) in a transcription factor  
179 required for tryptacidin production, *tpcD* (Afu4g14550), in a strain sequenced in this study  
180 (MO79587EXP) (Table S2). These data suggest that function of this SM gene cluster has been  
181 lost at least twice independently in *A. fumigatus*.

182

183 Individual nonsense or frameshift variants varied in frequency. For example, the non-  
184 ribosomal peptide synthase (NRPS) *pes3* gene (Afu5g12730) in SM gene cluster 21 harbors 16  
185 nonsense or frameshift polymorphisms in 55 strains, seven of which are common (present in  
186  $\geq 10$  strains) and another seven are rare ( $\leq 5$  strains). Strains with lab-mutated null alleles of the

187 *pes3* gene are more virulent than strains with functional copies [35], which may explain the  
188 widespread occurrence of null *pes3* alleles within *A. fumigatus*.

189

### 190 **Gene content polymorphisms**

191 We additionally identified several SM gene clusters that gained or lost genes in some  
192 strains. These gene content polymorphisms were most likely generated through genomic  
193 deletion or insertion events and were sometimes found at high frequencies among strains  
194 (Figure 1, Table 1). In three cases, these polymorphisms impact backbone synthesis genes,  
195 rendering the SM gene cluster non-functional.

196

197 One example involves SM gene cluster 14, whose standard composition includes a  
198 pyoverdine synthase gene, an NRPS-like gene, an NRPS backbone gene, and several additional  
199 modification genes (Figure 2A). Four of the 66 strains examined lack an 11-kb region on the 3'  
200 end of the cluster, which normally contains an NRPS gene and two additional cluster genes, and  
201 the first non-SM genes on the 3' end flanking the cluster. All *A. fumigatus* strains contain a  
202 *copia* family TE [36,37] at the 3' end of the cluster, suggesting that TEs may have been involved  
203 in the generation of this polymorphism. While this polymorphism could have arisen through a  
204 deletion event, a homologous cluster lacking the 11-kb region is also present in the reference  
205 genomes of *Aspergillus lentulus* and *Aspergillus fischeri*, close relatives of *A. fumigatus* (Figure  
206 2A). The most parsimonious explanation is that the genome of the *A. fumigatus* ancestor  
207 contained an SM gene cluster that lacked the 11-kb region, and that this genomic region was  
208 subsequently gained and increased in frequency within *A. fumigatus*.

209

210 The remaining two gene content polymorphisms affecting SM backbone genes were  
211 restricted to one strain each and appear to have arisen through genomic deletion events.  
212 Specifically, strain IF1SWF4 lacks an 8-Kb region near the helvolic acid SM gene cluster,  
213 resulting in the loss of the backbone oxidosqualene cyclase gene as well an upstream region  
214 containing two non-SM genes (Figure S1). Strain LMB35Aa lacks a 54-kb region on the end of



215 chromosome 2, which includes five genes from the telomere-proximal fumigaclavine C cluster  
216 (Figure S1).

217

218 Three other cases of gene content polymorphisms involved gene loss or truncation  
219 events of non-backbone structural genes. The second half of the ORF of the *gliM* O-  
220 methyltransferase gene in the gliotoxin gene cluster has been lost in 2 / 66 strains (Figure S1)  
221 and the first half of the permease *fmqE* in the fumiquinazoline gene cluster has been lost in 4 /  
222 66 strains (Figure S1). Finally, an ABC transporter gene in SM cluster 21 has been almost  
223 entirely lost in 21 / 66 strains (Figure S1). This deletion event is found in strains that are related  
224 in the SNP-based strain phylogeny but does not perfectly mirror the phylogeny (Figure 1).

225

### 226 **Whole gene cluster loss polymorphisms**

227 Several SM gene clusters were gained or lost entirely across strains. We observed  
228 several instances where a cluster present in the genome of either the reference Af293 or A1163  
229 (also known as CEA10) strains was absent or pseudogenized in other strains, which we present  
230 in this section.

231

232 One of the novel SM gene clusters, cluster 34, was present in all but two of the strains  
233 (Af293 and F7763). Cluster 34 contains a PKS backbone gene, one PKS-like gene with a single  
234 PKS associated domain, nine genes with putative biosynthetic functions involved in secondary  
235 metabolism, and six hypothetical proteins (Figure 2B). The two strains that lack cluster 34  
236 contain a likely non-functional cluster fragment that includes the PKS-like gene, two  
237 biosynthetic genes, and three hypothetical proteins. Interestingly, the 3' region flanking cluster  
238 34 is syntenic across all 66 strains but the 5' region is not, suggesting that a recombination or  
239 deletion event may have resulted in its loss in the Af293 and F7763 strains. These two strains  
240 form a clade in the strain phylogeny (Figure 1), so it is likely that this deletion or recombination  
241 event occurred once.

242

243 One notable example of an SM gene cluster present in the Af293 reference genome but  
244 absent or pseudogenized in others was SM cluster 4. This cluster contains 5 genes on the tip of  
245 the Af293 chromosome 1, and contains orthologs to five of the six genes in the fusarielin-  
246 producing gene cluster in *Fusarium graminearum* [38]. Cluster 4 is also present in several other  
247 *Aspergillus* species, including *A. clavatus* and *A. niger* [38], as well as in whole or in part in other  
248 non-*Aspergillus* fungi in the class Eurotiomycetes and in fungi in the class Sordariomycetes  
249 (Figure S3) [30,39–47]. Phylogenetic analysis of the genes in cluster 4 does not provide a clear  
250 view of the origin of this cluster, which is consistent either with extensive gene loss in both  
251 Sordariomycetes and Eurotiomycetes, or alternatively with horizontal gene transfer (HGT)  
252 between fungi belonging to the two classes (Figure S2, Figure S3).

253  
254 Cluster 4 is entirely absent in 4 / 66 strains, and its genes are undergoing  
255 pseudogenization in an additional 43 strains via multiple independent mutational events (Figure  
256 3). The four strains lacking the cluster form a single clade on the strain phylogeny, suggesting  
257 that the cluster was lost in a single deletion event (Figure 1). Further, 19 strains shared a single  
258 frameshift variant in the polyketide synthase gene (4380\_4381insAATGGGCT; frameshift at  
259 Glu1461 in Afu1g17740) and an additional 13 strains shared a single frameshift variant  
260 (242delG; frameshift at Gly81) in an aldose 1-epimerase gene (Afu1g17723) (Figure 3A, Table  
261 S2). Eleven other strains each contained one to several frameshift or nonsense polymorphisms  
262 involving nine unique mutational sites. Five of these strains contained multiple distinct  
263 frameshifts and premature stop codons in more than one gene in the cluster, indicating that  
264 the entire pathway is pseudogenized in these strains.

265  
266 A phylogeny of the entire cluster 4 locus across all 62 strains with short-read data shows  
267 that two pseudogenizing variants shared across multiple strains, one in the aldose 1-epimerase  
268 gene and one in the polyketide synthase, are found in loci that form well-supported clades  
269 (Figure 3B), suggesting that these variants arose once. Similarly, a set of variants shared across  
270 three strains and one variant shared in two strains are found in loci that form well-supported  
271 clades in the locus phylogeny. Two strains sharing a pseudogenizing variant in the polyketide

272 synthase do not group together in the locus phylogeny, a discordance likely stemming from  
273 within-locus recombination events. Finally, functional alleles of cluster 4 are distributed  
274 throughout the locus phylogeny, suggesting that the functional allele is ancestral and the  
275 pseudogenized variants are derived.

276  
277 Perhaps surprisingly, loss of function polymorphisms (from nonsense and frameshift  
278 mutations to wholesale cluster loss) are common and sometimes frequent within *A. fumigatus*.  
279 The majority of these polymorphisms are presumably neutral, and reflect the fact that any  
280 mutation is more likely to result in loss of a function than in gain. Consistent with this  
281 hypothesis is our observation that these loss events were often found at low frequencies.  
282 However, the possibility also exists that some of the high-frequency, recurrent loss of function  
283 polymorphisms may be adaptive. Given that many secondary metabolites are primarily  
284 secreted in the extracellular environment and can benefit nearby conspecifics that are not  
285 themselves producing the metabolite [51], individual strains may be circumventing the  
286 energetically costly process of producing the metabolite themselves in a situation analogous to  
287 the Black Queen hypothesis [52].

288

### 289 **Whole gene cluster gain polymorphisms**

290 By searching for novel SM gene clusters in the genomes of the other 65 *A. fumigatus*  
291 strains, we found three SM gene clusters that were absent from the genome of the Af293  
292 reference strain. As SM gene clusters are often present in repeat-rich and subtelomeric regions  
293 that are challenging to assemble [48,49], the strains analyzed here might harbor additional  
294 novel SM gene clusters that were not captured here.

295

296 One of these SM gene clusters, cluster 34, was mentioned earlier as an example of  
297 whole gene cluster loss polymorphism (Figure 2B) and is present in most strains but has been  
298 lost in two strains. The other two SM gene clusters absent from the Af293 genome are present  
299 at lower frequencies and likely reflect gene cluster gain events; cluster 35 is present in 2 / 66  
300 strains and cluster 36 in 4 / 66 strains. Cluster 35 is located in a region syntenic with an Af293

301 chromosome 4 region and is flanked on both sides by TEs (Figure S4). Eight of the 14 genes in  
302 this SM gene cluster are homologous to genes in an SM gene cluster in the genome of the  
303 insect pathogenic fungus *Metarhizium anisopliae* (Figure S4) [50]. Phylogenetic analysis of these  
304 8 genes is consistent with a horizontal transfer event (Figure S5). The two strains that contain  
305 this novel cluster are not sister to each other on the strain phylogeny (Figure 1).

306  
307 Cluster 36 is an NRPS-containing cluster located on shorter genomic scaffolds that lack  
308 homology to either the Af293 or A1163 genomes, making it impossible to determine on which  
309 chromosome this cluster is located (Figure S4). Two of the strains containing this novel cluster  
310 are sister to each other on the strain phylogeny, while the third is distantly related to these two  
311 (Figure 1). The evolutionary histories of the genes in the cluster are consistent with vertical  
312 inheritance, and these genes are present in multiple *Aspergillus* species.

313

#### 314 **Idiomorph polymorphisms**

315 One of the most peculiar types of polymorphisms that we identified is a locus containing  
316 different unrelated alleles of SM gene clusters, reminiscent of the idiomorph alleles at the  
317 fungal mating loci [53]. This locus, which resides on chromosome 3 and corresponds to cluster  
318 10 in the Af293 genome (Figure 4), was previously described as being strain-specific in a  
319 comparison between Af293 and A1163 strains [30] and is thought to reside in a recombination  
320 hot spot [28]. Our analysis showed that there are at least 6 different alleles of this cluster in *A.*  
321 *fumigatus*, containing 4 different types of key enzymes involved in natural product  
322 biosynthesis: a polyketide synthase (PKS) non-ribosomal peptide synthetase (NRPS) hybrid, a  
323 highly reducing (HR) PKS, a non-reducing (NR) PKS and an NRPS-like enzyme (Figure 4). Two  
324 additional alleles were present in only one strain each (Figure S6).

325

326 In the Af293 reference genome, the cluster present at the idiomorph locus contains one  
327 NR-PKS along with an NRPS-like gene (Allele B). In the A1163 reference genome and 17 other  
328 strains, there is a PKS-NRPS and an HR-NRPS at this locus (Allele E). These alleles show an  
329 almost complete lack of sequence similarity except for a conserved hypothetical protein and a

330 fragment of the HR-PKS in the Af293 allele; in contrast, the upstream and downstream flanking  
331 regions of the two alleles, which do not contain any backbone genes, are syntenic. Remarkably,  
332 another allele, present in 12 strains, contains all of the genes from both the Af293 and A1163  
333 clusters (Allele D). The remaining three alleles contain various combinations of these genes.  
334 One allele found in 22 strains contains some A1163-specific genes, including the HR-PKS, and no  
335 Af293-specific genes (Allele F), while another allele found in 3 strains contains some Af293-  
336 specific genes, including the NRPS-like gene, but no A1163 genes (Allele A). The final allele,  
337 present in 8 strains, contains the entire Af293 allele as well as part of the A1163 allele  
338 containing the HR-PKS (Allele C). Every allele is littered with multiple long terminal repeat  
339 sequence fragments from *gypsy* and *copia* TE families as well as with sequence fragments from  
340 DNA transposons from the *mariner* family [36]. In some cases, these TEs correspond with  
341 breakpoints in synteny between alleles, suggesting that the diverse alleles of this SM gene  
342 cluster may have arisen via TE-driven recombination. Further, both of the alleles that are  
343 restricted to a single strain have an insertion event of several genes near a TE, while the rest of  
344 the locus is highly similar to one of the more common alleles (Figure S6).

345  
346 Untargeted XCMS analysis [54] of an Allele D strain (08-19-02-30) and two Allele F  
347 strains (08-12-12-13 and 08-19-02-10) and comparison of their metabolite profiles revealed the  
348 presence of 2 unique masses in 08-19-02-30 (Table S4; Figure S7), raising the possibility that  
349 variation at the idiomorph locus is functional. Further analysis is underway to investigate  
350 whether any of these  $m/z$  can be directly linked to the Allele D sequence.

351  
352 To gain insight into the evolutionary history of this locus, we constructed a phylogeny  
353 based on its conserved downstream flanking region (Figure 4B). The resulting phylogeny shows  
354 some grouping of strains that share alleles, but there are no clades that contain all instances of  
355 a particular allele. This is likely to be the consequence of within-locus recombination between  
356 strains of *A. fumigatus*, which has been previously described at this locus [28] and which is  
357 potentially driven by the high number of repetitive sequences at this locus.

358

359           While it is tempting to speculate that Allele D, the longest allele containing all observed  
360 genes, represents the ancestral state, this does not explain the presence of a shared  
361 hypothetical protein and PKS gene fragment between Allele C and Allele B. Further, two close  
362 relatives of *A. fumigatus*, *A. lentulus* and *A. fischeri*, contain a similar region with conserved  
363 upstream and downstream flanking genes that is highly dissimilar from any of the alleles  
364 observed in *A. fumigatus* (Figure S8). In both species, this locus contains numerous TEs as well  
365 as genes homologous to portions of allele E in *A. fumigatus* (Figure S8). *A. fischeri* additionally  
366 contains two hypothetical proteins from the PKS-NRPS region of *A. fumigatus* and an additional  
367 hybrid PKS-NRPS-containing gene cluster not found in either *A. lentulus* or any *A. fumigatus*  
368 strain (Figure S8). Other genes at this locus in both *A. lentulus* and *A. fischeri* have functions  
369 likely not related to SM. Interestingly, *A. lentulus* contains a gene with a heterokaryon  
370 incompatibility protein domain, which may be involved in determining vegetative  
371 incompatibility [55]. Only one representative genome from each species has been sequenced,  
372 but based on the high concentration of TEs and lack of sequence similarity with any *A.*  
373 *fumigatus* alleles, it is likely that this locus is highly variable within both *A. lentulus* and *A.*  
374 *fischeri*.

375  
376           It is possible that polymorphism at this locus originated via SM gene cluster fusion or  
377 fission events driven by TEs, which are present in large numbers. Interestingly, two other  
378 previously described instances of SM gene cluster variation bear some resemblance to the *A.*  
379 *fumigatus* idiomorphic SM gene cluster 10 locus. The first is the presence of two non-  
380 homologous *Aspergillus flavus* alleles, where some strains contain a 9-gene sesquiterpene-like  
381 SM gene cluster and others contain a non-homologous 6-gene SM gene cluster at the same  
382 genomic location [56]. The second is the presence of two non-homologous SM gene clusters at  
383 the same, well-conserved, locus in a comparison of six species of dermatophyte fungi [57].  
384 Based on these results, we hypothesize that idiomorphic clusters may be common in fungal  
385 populations and contribute to the broad diversity of SM gene clusters across filamentous fungi.  
386

## 387 **Genomic location polymorphisms**

388       The final type of polymorphism that we observed is associated with SM gene clusters  
389 that are found in different genomic locations in different strains, suggesting that these SM gene  
390 clusters are behaving like mobile genetic elements. This type of polymorphism was observed in  
391 SM gene clusters 1 and 33, both of which produce as yet identified products, and are present at  
392 low frequencies in *A. fumigatus* strains.

393  
394       SM gene cluster 1, which is present in six strains at three different genomic locations  
395 (Figure 5A), consists of a PKS and four other structural genes that are always flanked by a 15 Kb  
396 region (upstream) and a 43 Kb region (downstream) containing TEs. In the reference Af293  
397 strain and in strain F7763, cluster 1 and its flanking regions are located on chromosome 1, while  
398 in strains 08-31-08-91, F13619, and Z5 they are located between Afu4g07320 and Afu4g07340  
399 on chromosome 4. In contrast, in strain JCM10253, the cluster and flanking regions are located  
400 on chromosome 8 immediately adjacent to the 3' end of the intertwined fumagillin and  
401 pseurotin SM gene supercluster [58]. The strains containing the allele on Chromosome 1 are  
402 sister to each other on the strain phylogeny, while the other strains are scattered across the  
403 tree and do not reflect the phylogeny (Figure 1).

404  
405       In 5 / 6 strains, cluster 1 appears to be functional and does not contain nonsense SNPs  
406 or indels. However, the cluster found on chromosome 1 in strain F7763 contains two stop  
407 codons in the oxidoreductase gene (Gln121\* and Gln220\*) and two premature stop codons in  
408 the polyketide synthase (Gln1156\* and Gln1542\*), suggesting this strain contains a null allele.

409  
410       This “jumping” gene cluster is not present in any other sequenced genome in the genus  
411 *Aspergillus*, and phylogenetic analysis of its constituent genes is consistent with HGT between  
412 fungi (Figure S7). Specifically, this gene cluster is also present in *Phaeosphaeria nodorum* [59], a  
413 plant pathogen from the class Dothideomycetes, *Pseudogymnoascus pannorum* [60], a fungus  
414 isolated from permafrost from the Leotiomycetes, and *Escovopsis weberi* [61], a fungal parasite  
415 of fungus-growing ants from the Sordariomycetes (Figure 5B). One additional species, the  
416 endophyte *Hypoxylon* sp. Cl4A from the class Sordariomycetes [62], contains four of the five

417 cluster genes but is missing Afu1g00970, an MFS drug transporter. However, this species  
418 contains a gene unrelated to Afu1g00970 that is annotated as an MFS drug transporter  
419 immediately adjacent to this cluster (Figure 5B). None of these fungi contain the upstream or  
420 downstream TE-rich flanking regions present in *A. fumigatus*, and each fungus contains  
421 additional unique genes with putative biosynthetic functions adjacent to the transferred  
422 cluster. The most likely explanation for this change in flanking regions is that this SM gene  
423 cluster was transferred into *A. fumigatus* once and has subsequently “jumped” in different  
424 genomic locations in different strains.

425  
426 The second SM gene cluster that shows variation in its genomic location across strains,  
427 cluster 33, contains a terpene synthase. This cluster is present in only 5 strains at 3 distinct  
428 locations (Figure 5C). Similar to cluster 1, cluster 33 is also flanked by TEs, and in one strain the  
429 cluster is located in a new region 58 Kb from SM gene cluster 34. Two strains that contain the  
430 cluster in the same genomic location are sister to each other on the strain phylogeny, while the  
431 placement of the other three strains containing the cluster does not reflect the phylogeny  
432 (Figure 1). In contrast to cluster 1, cluster 33 does not appear to have been horizontally  
433 transferred between fungi and its genes are present in other sequenced *Aspergillus* species  
434 [63], suggesting that the mobility of clusters 1 and 33 may be driven by different mechanisms.

435  
436 Interestingly, both cases of mobile gene clusters are located near or immediately  
437 adjacent to other SM gene clusters in some strains. Cluster 33 is located 58Kb away from  
438 cluster 34 in one strain and Cluster 1 is located immediately adjacent to the intertwined  
439 fumagillin and pseurotin supercluster [58] in another. This supercluster is regulated by the  
440 transcriptional factor *fapR* (Afu8g00420) and is located in a chromosomal region controlled by  
441 the master SM regulators *laeA* (Afu1g14660) and *veA* (Afu1g12490) [58,64], raising the  
442 hypothesis that mobile gene clusters might be co-opting the regulatory machinery acting on  
443 adjacent SM gene clusters. Previous work has hypothesized that the fumagillin and pseurotin  
444 supercluster formed through genomic rearrangement events placing the once-independent  
445 gene clusters in close proximity to each other [58]. Our observation that the mobile cluster 1 is



446 located in this same region not only supports this hypothesis but also implicates TEs as one of  
447 the mechanisms by which superclusters are formed. These superclusters may also represent an  
448 intermediate stage in the formation of new SM gene clusters. Supercluster formation,  
449 potentially mediated by mobile gene clusters, and followed by gene loss, could explain  
450 macroevolutionary patterns of SM gene clusters where clustered genes in one species are  
451 found to be dispersed over multiple gene clusters in other species [9,11].

452

## 453 **Conclusions**

454 Our examination of the genomes of 66 strains of *Aspergillus fumigatus* revealed five  
455 general types of polymorphisms that describe variation in SM gene clusters. These  
456 polymorphisms include variation in SNPs and short indels, gene and gene cluster gains and  
457 losses, non-homologous (idiomorph) gene clusters at the same genomic position, and mobile  
458 clusters that differ in their genomic location across strains (Figure 6). Previous work has  
459 demonstrated that SM gene clusters, like the metabolites that they produce, are highly  
460 divergent between fungal species [8,9,19,63]. Our examination of genome-wide variation  
461 shows that these SM gene clusters are also diverse across strains of a single fungal species.  
462 These results also demonstrate that the diversity of SM gene clusters within *A. fumigatus*  
463 cannot be captured by sequencing a single representative strain, which is the current standard  
464 practice for determining the SM gene cluster content of a fungal species.

465

466 The quantification of diversity in SM gene clusters within a species is dependent on both  
467 numbers and types of strains analyzed. The types of polymorphisms detected as well as their  
468 observed frequency, especially for rare polymorphisms, will increase with the number of  
469 genomes examined. In addition, both the frequencies of the different types of polymorphisms  
470 and the polymorphisms themselves may also change with sampling design, or in a manner  
471 corresponding to the population structure or ecology of the species under study. *A. fumigatus*  
472 is a cosmopolitan species with panmictic population structure [28], characteristics that do not  
473 always apply to other filamentous fungi. Fungi exhibiting strong population structure or fungi  
474 adapted to different ecological niches might contain different patterns of genetic diversity.

475  
476           Nevertheless, the variants and genetic drivers we observe at the within-species level are  
477 also implicated as driving SM gene cluster variation at the between-species level, suggesting  
478 that the observed microevolutionary processes are sufficient to explain macroevolutionary  
479 patterns of SM gene cluster evolution. For example, the narrow and discontinuous distribution  
480 of SM gene clusters across the fungal phylogeny has been attributed to HGT as well as to gene  
481 cluster loss [13,15,20,22,30,65–67]. Here, we find evidence that both processes also influence  
482 the distribution of SM gene clusters within a species (Figures 2, 5, S2-S5). Interestingly, the  
483 fraction of SM gene clusters within *A. fumigatus* that harbor loss of function polymorphisms is  
484 substantial, consistent with the macroevolutionary view that SM gene cluster loss is rampant  
485 [18,19,67]. However, our within-species observations are also consistent with the  
486 macroevolutionary importance of HGT to SM gene cluster evolution. Once thought to be non-  
487 existent in eukaryotes, HGT is now considered to be responsible for the presence of several  
488 different SM gene clusters in diverse filamentous fungi [13,67,68]. The instances of HGT of SM  
489 gene clusters within *A. fumigatus* suggests that acquisition of foreign genetic material  
490 containing SM gene clusters is likely a common and ongoing occurrence in fungal populations.

491  
492           One recurring theme across different types of SM gene cluster polymorphisms in *A.*  
493 *fumigatus* was the perpetual presence of TEs adjacent to or within clusters. One particularly  
494 striking case is the “idiomorphic” Cluster 10, where TEs seem to correspond with breakpoints in  
495 synteny both within *A. fumigatus* and also between *A. fumigatus* and its close relatives (Figure  
496 4, Figure S8). TEs were also present flanking mobile and horizontally transferred SM gene  
497 clusters and were located adjacent to gene gain sites. There are several potential explanations  
498 for the observed TE enrichment. First, TE presence may promote repeat-driven recombination  
499 and gene rearrangement, or the TEs themselves may be the agents of horizontally transferred  
500 clusters (either on their own or through a viral vector). Alternatively, it may simply be the case  
501 that SM gene clusters preferentially reside in TE-rich genomic regions.

502

503           In summary, examination of SM gene cluster variation within a single fungal species  
504 revealed five distinct types of polymorphism that are widespread across different types of SM  
505 gene clusters and are caused by many underlying genetic drivers, including errors in DNA  
506 transcription and repair, non-homologous recombination, gene duplication and loss, and HGT.  
507 The net effect of the observed variation raises the hypothesis that the chemical products of  
508 filamentous fungal species are in a state of evolutionary flux, each population constantly  
509 altering its SM gene cluster repertoire and consequently modifying its chemodiversity.

## 510 **Methods**

### 511 **Strains analyzed**

512           Eight strains of *A. fumigatus* were isolated from four patients with recurrent cases of  
513 aspergillosis in the Portuguese Oncology Institute in Porto, Portugal. Each strain was  
514 determined to be *A. fumigatus* using macroscopic features of the culture and microscopic  
515 morphology observed in the slide preparation from the colonies with lactophenol solution [69].  
516 Based on the morphological characterization, all clinical strains were classified as *A. fumigatus*  
517 *complex*-Fumigati. After whole genome sequencing, retrieval and examination of the beta  
518 tubulin and calmodulin sequences of each strain confirmed that all strains belonged to *A.*  
519 *fumigatus* (see Phylogenetic Analysis and Figure S9). The genomes of all eight strains were  
520 sequenced using 150bp Illumina paired-end sequence reads at the Genomic Services Lab of  
521 Hudson Alpha (Huntsville, Alabama, USA). Genomic libraries were constructed with the Illumina  
522 TruSeq library kit and sequenced on an Illumina HiSeq 2500 sequencer. Samples of all eight  
523 strains were sequenced at greater than 180X coverage or depth (Table S1). Short read  
524 sequences for these 8 strains are available in the Short Read Archive under accession  
525 SRP109032.

526

527           In addition to the 8 strains sequenced in this study, we retrieved 58 *A. fumigatus* strains  
528 with publicly available whole genome sequencing data, resulting in a dataset of 66 strains  
529 (Table S1). The strains used included both environmental and clinical strains and were isolated  
530 from multiple continents. Genome assemblies for 10 of these strains, including the Af293 and  
531 A1163 reference strains, were available for download from GenBank [28–32,70]. For 6 of these  
532 strains, short read sequences were also available from the NCBI Short Read Archive (SRA),  
533 which were used for variant discovery only (see Single nucleotide variant (SNV) and indel  
534 discovery) and not for genome assembly. Short read sequences were not available for the  
535 remaining 4 strains. Short read sequences were downloaded for an additional 48 strains from  
536 the Short Read Archive if they were sequenced with paired-end reads and at greater than 30x  
537 coverage.

538

### 539 **Single nucleotide variant (SNV) and indel discovery**

540 All strains with available short read data (62 of 66 strains) were aligned to both the  
541 Af293 and A1163 reference genomes using BWA mem version 0.7.12-r1044 [71]. Coverage of  
542 genes present in the reference genome was calculated using bedtools v2.25.0 [72]. SNV and  
543 indel discovery and genotyping was performed relative to the Af293 reference genome and was  
544 conducted across all samples simultaneously using the Genome Analysis Toolkit version 3.5-0-  
545 g36282e4 with recommended hard filtering parameters [73–75] and annotated using snpEff  
546 version 4.2 [76].

547

### 548 ***De novo* genome assembly and gene annotation**

549 All 56 strains without publicly available genome assemblies were *de novo* assembled  
550 using the iWGS pipeline [77]. Specifically, all strains were assembled using SPAdes v3.6.2 and  
551 MaSuRCA v3.1.3 and resulting assemblies were evaluated using QUAST v3.2 [78–80]. The  
552 average N50 of assemblies constructed with this strategy was 463 KB (Table S1). Genes were  
553 annotated in these assemblies as well as in five GenBank assemblies with no predicted genes  
554 using augustus v3.2.2 trained on *A. fumigatus* gene models [81]. Repetitive elements were  
555 annotated in all assemblies using RepeatMasker version open-4.0.6 [82].

556

### 557 **Secondary metabolic gene cluster annotation and discovery**

558 Secondary metabolic gene clusters in the Af293 reference genome were taken from two  
559 recent reviews, both of which considered computational and experimental data to delineate  
560 cluster boundaries [83,84] (Table S3). The genomes of the other 65 strains were scanned for  
561 novel SM gene clusters using antiSMASH v3.0.5.1 [85]. To prevent potential assembly errors  
562 from confounding the analysis, any inference about changes in genomic locations of genes or  
563 gene clusters was additionally verified by manually inspecting alignments and ensuring that  
564 paired end reads supported an alternative genomic location (see SNV and indel discovery).  
565 Cases where paired end reads did not support the change in genomic location (i.e., all 3' read  
566 mapping to Chromosome 1 and all 5' pairs mapping to Chromosome 8), or where mapping was  
567 ambiguous or low quality were discarded.

568

## 569 **Phylogenetic analysis**

570 To confirm all strains in this analysis belonged to the species *Aspergillus fumigatus*, the  
571 genomic sequences of the beta tubulin and calmodulin genes were extracted from the  
572 assembled genomes of all strains. Gene phylogenies were constructed using *Aspergillus*  
573 *fischerianus* as an outgroup using RAxML v8.0.25 with the GTRGAMMA substitution model [86].  
574 The tree was midpoint rooted and all branches with bootstrap support less than 80% were  
575 collapsed (Figure S10).

576

577 To construct a SNP-based strain phylogeny, biallelic SNPs with no missing data were  
578 pruned using SNPRelate v1.8.0 with a linkage disequilibrium threshold of 0.8 [87]. A total of  
579 15,274 SNVs were used to create a phylogeny using RAxML v8.0.25 with the ASC\_BINGAMMA  
580 substitution model [86]. The tree was midpoint rooted and all branches with bootstrap support  
581 less than 80% were collapsed. The phylogeny was visualized using ITOL version 3.0 [88].

582

583 To understand the evolutionary histories of specific SM gene clusters showing unusual  
584 taxonomic distributions, we reconstructed the phylogenetic trees of their SM genes.  
585 Specifically, SM cluster protein sequences were queried against a local copy of the NCBI non-  
586 redundant protein database (downloaded May 30, 2017) using phmmer, a member of the  
587 HMMER3 software suite [89] using acceleration parameters --F1 1e-5 --F2 1e-7 --F3 1e-10. A  
588 custom perl script sorted the phmmer results based on the normalized bitscore (nbs), where  
589 nbs was calculated as the bitscore of the single best-scoring domain in the hit sequence divided  
590 by the best bitscore possible for the query sequence (i.e., the bitscore of the query aligned to  
591 itself). No more than five hits were retained for each unique NCBI Taxonomy ID. Full-length  
592 proteins corresponding to the top 100 hits ( $E$ -value  $< 1 \times 10^{-10}$ ) to each query sequence were  
593 extracted from the local database using esl-sfetch [89]. Sequences were aligned with MAFFT  
594 v7.310 using the E-INS-i strategy and the BLOSUM30 amino acid scoring matrix [90] and  
595 trimmed with trimAL v1.4.rev15 using its gappyout strategy [91]. The topologies were inferred  
596 using maximum likelihood as implemented in RAxML v8.2.9 [86] using empirically determined

597 substitution models and rapid bootstrapping (1000 replications). The phylogenies were  
598 midpoint rooted and branches with less than 80% bootstrap support were collapsed using the  
599 ape and phangorn R packages [92,93]. Phylogenies were visualized using ITOL version 3.0 [88].

600  
601 To understand the evolutionary histories of SM gene clusters 4 and 10, full-length  
602 nucleotide sequences of all 62 strains with short read sequence data were extracted for the  
603 entire cluster region (SM gene cluster 4) or the downstream flanking region (SM gene cluster  
604 10) using the previously described SNV analysis procedure followed by Genome Analysis  
605 Toolkit's "ExtractAlternativeReferenceFasta" tool [74]. The resulting nucleotide sequences were  
606 aligned using MAFFT v7.310 [90]. Phylogenies were constructed using maximum likelihood as  
607 implemented in RAxML v 8.0.25, using the GTRGAMMA substitution model and rapid  
608 bootstrapping (1000 replications) [86]. Phylogenies were midpoint rooted and branches with  
609 less than 80% bootstrap support were collapsed. Phylogenies were visualized using ITOL version  
610 3.0 [88].

611

#### 612 **Differential metabolite analysis**

613 For natural product analysis,  $5 \times 10^6$  spores/mL for the indicated strains were grown in  
614 50 mL liquid GMM [94] for five days at 25 °C and 250 rpm in duplicates. Supernatants were  
615 extracted with equal volumes of ethyl acetate, dried down and resuspended in 20% acetonitrile  
616 (ACN). Each sample was analyzed by ultra-high performance liquid chromatography (UHPLC)  
617 coupled with mass spectrometry (MS). The samples were separated on a ZORBAX Eclipse XDB-  
618 C18 column (Agilent, 2.1 x 150 mm with a 1.8  $\mu$ M particle size using a binary gradient of 0.5 %  
619 (v/v) formic acid (FA) as solvent A and 0.5 % (v/v) FA in ACN as solvent B that was delivered by a  
620 Vanquish<sup>TM</sup> UHPLC system (Thermo Scientific) with a flow rate of 0.2 mL/min. The binary  
621 gradient started with 20% B that was increased with a linear gradient to 100% B in 15 min  
622 followed by an isocratic step at 100% B for 5 min. Before every run, the system was equilibrated  
623 for 5 min at 20% B. The UHPLC system was coupled to a Q Exactive hybrid quadrupole  
624 Orbitrap<sup>TM</sup> MS (Thermo Scientific). For electrospray ionization, the ion voltage was set at +/-3.5  
625 kV in positive and negative mode, respectively. Nitrogen was used as sheath gas at a flow rate

626 of 45 and as sweep gas at a flow rate of 2. Data analysis was performed using XCMS [54] and  
627 Maven [95] software.  
628



629

630 **Acknowledgements**

631 A.L.L. was supported by the U.S. National Library of Medicine training grant 2T15LM007450.  
632 This work was supported in part by the National Science Foundation (IOS-1401682 to J.H.W.  
633 and DEB-1442113 to A.R.), the National Institutes of Health (NIH grant R01 AI065728-01 to  
634 N.P.K), and by the Northern Portugal Regional Operational Programme (NORTE 2020) under the  
635 Portugal 2020 Partnership Agreement through the European Regional Development Fund  
636 (FEDER) (NORTE-01-0145-FEDER-000013 to F.R.). G.H.G. thanks the Fundação de Amparo à  
637 Pesquisa do Estado de São Paulo (FAPESP) and Conselho Nacional de Desenvolvimento  
638 Científico e Tecnológico (CNPq), both from Brazil, for funding and support. This work was  
639 conducted in part using the resources of the Advanced Computing Center for Research and  
640 Education at Vanderbilt University (<http://www.accre.vanderbilt.edu/>).

641

642 **Author contributions**

643 Conceptualization, A.R., G.H.G., A.L.L.; Methodology, A.L.L., J.H.W, C.L, P.W., J.M.P.;  
644 Investigation, A.L.L.; Visualization, A.L.L., J.H.W, P.W.; Resources, G.H.G., F.R., N.P.K., C.L.;  
645 Writing, A.L.L, A.R.

646

647 **Table 1. Types and rates of SM gene cluster variants in *A. fumigatus* strains.**

648

| Description                                | Phenotype                                                                                                                 | Drivers                                                                        | Frequency at cluster level                                                     | Frequency at strain level   | Previous reports                                                                                                                                                 |
|--------------------------------------------|---------------------------------------------------------------------------------------------------------------------------|--------------------------------------------------------------------------------|--------------------------------------------------------------------------------|-----------------------------|------------------------------------------------------------------------------------------------------------------------------------------------------------------|
| Single-nucleotide polymorphisms and indels | Potential for protein function change (missense); abrogation of protein function (nonsense and frameshift)                | DNA replication errors; relaxation of purifying selection                      | 100% (33/33 clusters; missense); 70% (23/33 clusters; nonsense and frameshift) | Every strain affected       | Bikaverin in <i>Botrytis</i> [17,27], aflatoxin in <i>Aspergillus oryzae</i> and <i>Aspergillus flavus</i> [26], fumonisins in <i>Fusarium</i> [10], many others |
| Gene content polymorphisms                 | Loss of gene cluster function; structural changes in the metabolite; change in cluster expression or metabolite transport | Deletion and insertion events; recombination; transposable elements            | 6 clusters                                                                     | 27 / 66 strains             | Trichothecene in <i>Fusarium</i> , aflatoxin and sterigmatocystin in <i>Aspergillus</i> [11–15], HC toxin in <i>Cochliobolus carbonarum</i> [96]                 |
| Whole gene cluster polymorphisms           | Loss or gain of novel metabolites                                                                                         | Deletion and insertion events; horizontal gene transfer; transposable elements | 6 clusters                                                                     | 13 / 66 strains             | Gibberellin and fumonisin in <i>Fusarium</i> [24,25]                                                                                                             |
| Cluster idiomorphs                         | Changes in metabolites produced or structure of metabolites                                                               | Transposable elements; recombination; other mechanisms?                        | 1 gene cluster                                                                 | 8 unique identified alleles | Putative SM gene clusters in dermatophytes; putative SM gene cluster in <i>Aspergillus flavus</i> and <i>Aspergillus oryzae</i> [56,57]                          |
| Mobile gene clusters                       | Potential for change in gene regulation                                                                                   | Transposable elements; horizontal gene transfer; other mechanisms?             | 2 gene clusters                                                                | 8 / 66 strains              | None                                                                                                                                                             |

649

650

- 651 **Figure S1. Alignments showing deletion of genes in SM gene clusters.**
- 652
- 653 **Figure S2. Gene phylogenies of the fusarielin-like SM gene cluster 4.**
- 654
- 655 **Figure S3. Fusarielin-like gene clusters in Eurotiomycetes and Sordariomycetes.**
- 656
- 657 **Figure S4. Novel SM gene clusters in *A. fumigatus* strains.**
- 658
- 659 **Figure S5. Gene phylogenies of SM gene cluster 34.**
- 660
- 661 **Figure S6. Two alleles of the idiomorphic SM gene cluster 10 present in one strain each.**
- 662
- 663 **Figure S7. Metabolomics analysis of strains with different alleles of the idiomorphic cluster**
- 664 **indicates presence of different metabolites.**
- 665
- 666 **Figure S8. Idiomorphic locus in other species.**
- 667
- 668 **Figure S9. Gene phylogenies of the mobile SM gene cluster 1.**
- 669
- 670 **Figure S10. Marker gene phylogenies of all strains and *Aspergillus fischeri*.**
- 671
- 672 **Table S1. Summary of strains, sequence data, and assemblies used.**
- 673
- 674 **Table S2. All nonsynonymous variants in SM gene cluster genes.**
- 675
- 676 **Table S3. Description, locus tags, and gene annotations of all reference Af293 SM gene**
- 677 **clusters.**
- 678
- 679 **Table S4. XCMS analysis of extracted supernatants from 08-19-02-30, 08-12-12-13, and 08-19-**
- 680 **02-10.**
- 681
- 682

683

## 684 **References**

- 685 1. Vining LC. Functions of secondary metabolites. *Annu Rev Microbiol. Annual Reviews* 4139  
686 El Camino Way, P.O. Box 10139, Palo Alto, CA 94303-0139, USA; 1990;44: 395–427.  
687 doi:10.1146/annurev.mi.44.100190.002143
- 688 2. Schimek C. Evolution of Special Metabolism in Fungi: Concepts , Mechanisms , and  
689 Pathways. In: Pöggler S, Wöstmeyer J, editors. *Evolution of Fungi and Fungal-Like*  
690 *Organisms, The Mycota. XIV.* Berlin, Heidelberg: Springer-Verlag; 2011. pp. 293–328.
- 691 3. Fox EM, Howlett BJ. Secondary metabolism: regulation and role in fungal biology. *Curr*  
692 *Opin Microbiol.* 2008;11: 481–7. doi:10.1016/j.mib.2008.10.007
- 693 4. Scharf DH, Heinekamp T, Brakhage AA. Human and Plant Fungal Pathogens: The Role of  
694 Secondary Metabolites. Heitman J, editor. *PLoS Pathog.* Public Library of Science;  
695 2014;10: e1003859. doi:10.1371/journal.ppat.1003859
- 696 5. Yim G, Wang HH, Davies J. Antibiotics as signalling molecules. *Philos Trans R Soc Lond B*  
697 *Biol Sci.* 2007;362: 1195–200. doi:10.1098/rstb.2007.2044
- 698 6. Keller NP. Translating biosynthetic gene clusters into fungal armor and weaponry. *Nat*  
699 *Chem Biol.* Nature Publishing Group, a division of Macmillan Publishers Limited. All Rights  
700 Reserved.; 2015;11: 671–7. doi:10.1038/nchembio.1897
- 701 7. Bennett J, Bentley R. What’s in a name?—Microbial secondary metabolism. *Adv Appl*  
702 *Microbiol.* 1989;34. Available:  
703 [http://www.sciencedirect.com/science/article/pii/S0065216408703162/pdf?md5=07c2a](http://www.sciencedirect.com/science/article/pii/S0065216408703162/pdf?md5=07c2af4dcbe482f13a1b94eb2f886c2e&pid=1-s2.0-S0065216408703162-main.pdf&_valck=1)  
704 [f4dcbe482f13a1b94eb2f886c2e&pid=1-s2.0-S0065216408703162-main.pdf&\\_valck=1](http://www.sciencedirect.com/science/article/pii/S0065216408703162/pdf?md5=07c2af4dcbe482f13a1b94eb2f886c2e&pid=1-s2.0-S0065216408703162-main.pdf&_valck=1)
- 705 8. Khaldi N, Seifuddin FT, Turner G, Haft D, Nierman WC, Wolfe KH, et al. SMURF: Genomic  
706 mapping of fungal secondary metabolite clusters. *Fungal Genet Biol.* 2010;47: 736–41.  
707 doi:10.1016/j.fgb.2010.06.003
- 708 9. Lind AL, Wisecaver JH, Smith TD, Feng X, Calvo AM, Rokas A. Examining the evolution of  
709 the regulatory circuit controlling secondary metabolism and development in the fungal  
710 genus *Aspergillus*. *PLoS Genet.* Public Library of Science; 2015;11: e1005096.  
711 doi:10.1371/journal.pgen.1005096
- 712 10. Proctor RH, Busman M, Seo J-A, Lee YW, Plattner RD. A fumonisin biosynthetic gene  
713 cluster in *Fusarium oxysporum* strain O-1890 and the genetic basis for B versus C  
714 fumonisin production. *Fungal Genet Biol.* 2008;45: 1016–1026.  
715 doi:10.1016/j.fgb.2008.02.004
- 716 11. Proctor RH, McCormick SP, Alexander NJ, Desjardins AE. Evidence that a secondary  
717 metabolic biosynthetic gene cluster has grown by gene relocation during evolution of the  
718 filamentous fungus *Fusarium*. *Mol Microbiol.* 2009;74: 1128–42. doi:10.1111/j.1365-  
719 2958.2009.06927.x

- 720 12. Berry DB, Guan Q, Hose J, Haroon S, Gebbia M, Heisler LE, et al. Multiple Means to the  
721 Same End: The Genetic Basis of Acquired Stress Resistance in Yeast. Copenhaver GP,  
722 editor. PLoS Genet. Public Library of Science; 2011;7: e1002353.  
723 doi:10.1371/journal.pgen.1002353
- 724 13. Slot JC, Rokas A. Horizontal transfer of a large and highly toxic secondary metabolic gene  
725 cluster between fungi. Curr Biol. Elsevier Ltd; 2011;21: 134–9.  
726 doi:10.1016/j.cub.2010.12.020
- 727 14. Ehrlich KC, Chang P-K, Yu J, Cotty PJ. Aflatoxin Biosynthesis Cluster Gene *cypA* Is Required  
728 for G Aflatoxin Formation. Appl Environ Microbiol. 2004;70: 6518–6524.  
729 doi:10.1128/AEM.70.11.6518-6524.2004
- 730 15. Carbone I, Ramirez-Prado JH, Jakobek JL, Horn BW. Gene duplication, modularity and  
731 adaptation in the evolution of the aflatoxin gene cluster. BMC Evol Biol. 2007;7: 111.  
732 doi:10.1186/1471-2148-7-111
- 733 16. Yu J, Chang P-K, Ehrlich KC, Cary JW, Bhatnagar D, Cleveland TE, et al. Clustered pathway  
734 genes in aflatoxin biosynthesis. Appl Environ Microbiol. American Society for  
735 Microbiology; 2004;70: 1253–62. doi:10.1128/AEM.70.3.1253-1262.2004
- 736 17. Campbell M a, Rokas A, Slot JC. Horizontal transfer and death of a fungal secondary  
737 metabolic gene cluster. Genome Biol Evol. 2012;4: 289–93. doi:10.1093/gbe/evs011
- 738 18. Kroken S, Glass NL, Taylor JW, Yoder OC, Turgeon BG. Phylogenomic analysis of type I  
739 polyketide synthase genes in pathogenic and saprobic ascomycetes. Proc Natl Acad Sci U  
740 S A. 2003;100: 15670–5. doi:10.1073/pnas.2532165100
- 741 19. Bushley KE, Turgeon BG. Phylogenomics reveals subfamilies of fungal nonribosomal  
742 peptide synthetases and their evolutionary relationships. BMC Evol Biol. 2010;10: 26.  
743 doi:10.1186/1471-2148-10-26
- 744 20. Patron NJ, Waller RF, Cozijnsen AJ, Straney DC, Gardiner DM, Nierman WC, et al. Origin  
745 and distribution of epipolythiodioxopiperazine (ETP) gene clusters in filamentous  
746 ascomycetes. BMC Evol Biol. 2007;7: 174. doi:10.1186/1471-2148-7-174
- 747 21. Khaldi N, Collemare J, Lebrun M-H, Wolfe KH. Evidence for horizontal transfer of a  
748 secondary metabolite gene cluster between fungi. Genome Biol. BioMed Central; 2008;9:  
749 R18. doi:10.1186/gb-2008-9-1-r18
- 750 22. Khaldi N, Wolfe KH. Evolutionary Origins of the Fumonisin Secondary Metabolite Gene  
751 Cluster in *Fusarium verticillioides* and *Aspergillus niger*. Int J Evol Biol. Hindawi Publishing  
752 Corporation; 2011;2011: 423821. doi:10.4061/2011/423821
- 753 23. Reynolds HT, Slot JC, Divon HH, Lysøe E, Proctor RH, Brown DW. Differential Retention of  
754 Gene Functions in a Secondary Metabolite Cluster. Mol Biol Evol. Oxford University Press  
755 (OUP); 2017;10: e1004816. doi:10.1093/molbev/msx145

- 756 24. Wiemann P, Sieber CMK, von Bargen KW, Studt L, Niehaus E-M, Espino JJ, et al.  
757 Deciphering the Cryptic Genome: Genome-wide Analyses of the Rice Pathogen *Fusarium*  
758 *fujikuroi* Reveal Complex Regulation of Secondary Metabolism and Novel Metabolites.  
759 Mitchell AP, editor. PLoS Pathog. Public Library of Science; 2013;9: e1003475.  
760 doi:10.1371/journal.ppat.1003475
- 761 25. Chiara M, Fanelli F, Mulè G, Logrieco AF, Pesole G, Leslie JF, et al. Genome Sequencing of  
762 Multiple Isolates Highlights Subtelomeric Genomic Diversity within *Fusarium fujikuroi*.  
763 Genome Biol Evol. 2015;7: 3062–3069. doi:10.1093/gbe/evv198
- 764 26. Chang P-K, Horn BW, Dorner JW. Sequence breakpoints in the aflatoxin biosynthesis gene  
765 cluster and flanking regions in nonaflatoxigenic *Aspergillus flavus* isolates. Fungal Genet  
766 Biol. 2005;42: 914–923. doi:10.1016/j.fgb.2005.07.004
- 767 27. Schumacher J, Gautier A, Morgant G, Studt L, Ducrot P-H, Le Pêcheur P, et al. A  
768 Functional Bikaverin Biosynthesis Gene Cluster in Rare Strains of *Botrytis cinerea* Is  
769 Positively Controlled by VELVET. Yun S-H, editor. PLoS One. Public Library of Science;  
770 2013;8: e53729. doi:10.1371/journal.pone.0053729
- 771 28. Abdolrasouli A, Rhodes J, Beale MA, Hagen F, Rogers TR, Chowdhary A, et al. Genomic  
772 Context of Azole Resistance Mutations in *Aspergillus fumigatus* Determined Using  
773 Whole-Genome Sequencing. MBio. 2015;6. doi:10.1128/mBio.00536-15
- 774 29. Nierman WC, Pain A, Anderson MJ, Wortman JR, Kim HS, Arroyo J, et al. Genomic  
775 sequence of the pathogenic and allergenic filamentous fungus *Aspergillus fumigatus*.  
776 Nature. 2005;438: 1151–6. doi:10.1038/nature04332
- 777 30. Fedorova ND, Khaldi N, Joardar VS, Maiti R, Amedeo P, Anderson MJ, et al. Genomic  
778 islands in the pathogenic filamentous fungus *Aspergillus fumigatus*. Richardson PM,  
779 editor. PLoS Genet. Public Library of Science; 2008;4: e1000046.  
780 doi:10.1371/journal.pgen.1000046
- 781 31. Knox BP, Blachowicz A, Palmer JM, Romsdahl J, Huttenlocher A, Wang CCC, et al.  
782 Characterization of *Aspergillus fumigatus* Isolates from Air and Surfaces of the  
783 International Space Station. mSphere. 2016;1.
- 784 32. Paul S, Zhang A, Ludeña Y, Villena GK, Yu F, Sherman DH, et al. Insights from the genome  
785 of a high alkaline cellulase producing *Aspergillus fumigatus* strain obtained from Peruvian  
786 Amazon rainforest. J Biotechnol. 2017;251: 53–58. doi:10.1016/j.jbiotec.2017.04.010
- 787 33. Roberts JD, Kunkel TA. Fidelity of DNA replication. In: DePamphilis ML, editor. DNA  
788 replication in eukaryotic cells. Cold Spring Harbor, New York: Cold Spring Harbor  
789 Laboratory Press; 1996. pp. 217–247.
- 790 34. Throckmorton K, Lim FY, Kontoyiannis DP, Zheng W, Keller NP. Redundant synthesis of a  
791 conidial polyketide by two distinct secondary metabolite clusters in *Aspergillus*  
792 *fumigatus*. Environ Microbiol. 2015; doi:10.1111/1462-2920.13007

- 793 35. O'Hanlon KA, Cairns T, Stack D, Schrettl M, Bignell EM, Kavanagh K, et al. Targeted  
794 Disruption of Nonribosomal Peptide Synthetase *pes3* Augments the Virulence of  
795 *Aspergillus fumigatus*. *Infect Immun*. 2011;79: 3978–3992. doi:10.1128/IAI.00192-11
- 796 36. Kapitonov V V., Jurka J. A universal classification of eukaryotic transposable elements  
797 implemented in Repbase. *Nat Rev Genet*. Nature Publishing Group; 2008;9: 411–412.  
798 doi:10.1038/nrg2165-c1
- 799 37. Mount SM, Rubin GM. Complete nucleotide sequence of the *Drosophila* transposable  
800 element *copia*: homology between *copia* and retroviral proteins. *Mol Cell Biol*. 1985;5:  
801 1630–8. Available: <http://www.ncbi.nlm.nih.gov/pubmed/2410772>
- 802 38. Sørensen JL, Hansen FT, Sondergaard TE, Staerk D, Lee TV, Wimmer R, et al. Production  
803 of novel fusarielins by ectopic activation of the polyketide synthase 9 cluster in *Fusarium*  
804 *graminearum*. *Environ Microbiol*. Blackwell Publishing Ltd; 2012;14: 1159–1170.  
805 doi:10.1111/j.1462-2920.2011.02696.x
- 806 39. Futagami T, Mori K, Yamashita A, Wada S, Kajiwara Y, Takashita H, et al. Genome  
807 Sequence of the White Koji Mold *Aspergillus kawachii* IFO 4308, Used for Brewing the  
808 Japanese Distilled Spirit Shochu. *Eukaryot Cell*. 2011;10: 1586–1587.  
809 doi:10.1128/EC.05224-11
- 810 40. Andersen MR, Salazar MP, Schaap PJ, van de Vondervoort PJI, Culley D, Thykaer J, et al.  
811 Comparative genomics of citric-acid-producing *Aspergillus niger* ATCC 1015 versus  
812 enzyme-producing CBS 513.88. *Genome Res*. 2011;21: 885–97.  
813 doi:10.1101/gr.112169.110
- 814 41. Yu J, Wu G, Jurick WM, Gaskins VL, Yin Y, Yin G, et al. Genome Sequence of *Penicillium*  
815 *solitum* RS1, Which Causes Postharvest Apple Decay. *Genome Announc*. 2016;4: e00363-  
816 16. doi:10.1128/genomeA.00363-16
- 817 42. Yamada O, Machida M, Hosoyama A, Goto M, Takahashi T, Futagami T, et al. Genome  
818 sequence of *Aspergillus luchuensis* NBRC 4314. *DNA Res*. 2016;23: 507–515.  
819 doi:10.1093/dnares/dsw032
- 820 43. Cheeseman K, Ropars J, Renault P, Dupont J, Gouzy J, Branca A, et al. Multiple recent  
821 horizontal transfers of a large genomic region in cheese making fungi. *Nat Commun*.  
822 2014;5: 2876. doi:10.1038/ncomms3876
- 823 44. Baroncelli R, Sreenivasaprasad S, Sukno SA, Thon MR, Holub E. Draft Genome Sequence  
824 of *Colletotrichum acutatum* Ssensu Lato (*Colletotrichum fioriniae*). *Genome Announc*.  
825 2014;2: e00112-14-e00112-14. doi:10.1128/genomeA.00112-14
- 826 45. Hacquard S, Kracher B, Hiruma K, Münch PC, Garrido-Oter R, Thon MR, et al. Survival  
827 trade-offs in plant roots during colonization by closely related beneficial and pathogenic  
828 fungi. *Nat Commun*. 2016;7: 11362. doi:10.1038/ncomms11362

- 829 46. King R, Urban M, Hammond-Kosack MCU, Hassani-Pak K, Hammond-Kosack KE. The  
830 completed genome sequence of the pathogenic ascomycete fungus *Fusarium*  
831 *graminearum*. *BMC Genomics*. 2015;16: 544. doi:10.1186/s12864-015-1756-1
- 832 47. Kazan K, Gardiner DM, Manners JM. On the trail of a cereal killer: Recent advances in  
833 *Fusarium graminearum* pathogenomics and host resistance [Internet]. *Molecular Plant*  
834 *Pathology*. 2012. pp. 399–413. doi:10.1111/j.1364-3703.2011.00762.x
- 835 48. Treangen TJ, Salzberg SL. Repetitive DNA and next-generation sequencing: computational  
836 challenges and solutions. *Nat Rev Genet*. NIH Public Access; 2011;13: 36–46.  
837 doi:10.1038/nrg3117
- 838 49. Palmer JM, Keller NP. Secondary metabolism in fungi: does chromosomal location  
839 matter? *Curr Opin Microbiol*. 2010;13: 431–6. doi:10.1016/j.mib.2010.04.008
- 840 50. Gao Q, Jin K, Ying S-H, Zhang Y, Xiao G, Shang Y, et al. Genome sequencing and  
841 comparative transcriptomics of the model entomopathogenic fungi *Metarhizium*  
842 *anisopliae* and *M. acridum*. Achtman M, editor. *PLoS Genet*. Public Library of Science;  
843 2011;7: e1001264. doi:10.1371/journal.pgen.1001264
- 844 51. Richards TA, Talbot NJ. Horizontal gene transfer in osmotrophs: playing with public  
845 goods. *Nat Rev Microbiol*. Nature Research; 2013;11: 720–727. doi:10.1038/nrmicro3108
- 846 52. Morris JJ, Lenski RE, Zinser ER. The Black Queen Hypothesis: evolution of dependencies  
847 through adaptive gene loss. *MBio*. American Society for Microbiology; 2012;3: e00036-  
848 12. doi:10.1128/mBio.00036-12
- 849 53. Metzenberg RL, Glass NL. Mating type and mating strategies in *Neurospora*. *BioEssays*.  
850 Wiley Subscription Services, Inc., A Wiley Company; 1990;12: 53–59.  
851 doi:10.1002/bies.950120202
- 852 54. Smith CA, Want EJ, O’Maille G, Abagyan R, Siuzdak G. XCMS: Processing Mass  
853 Spectrometry Data for Metabolite Profiling Using Nonlinear Peak Alignment, Matching,  
854 and Identification. *Anal Chem*. 2006;78: 779–787. doi:10.1021/ac051437y
- 855 55. Espagne E, Balhadère P, Penin M-L, Barreau C, Turcq B. HET-E and HET-D belong to a new  
856 subfamily of WD40 proteins involved in vegetative incompatibility specificity in the  
857 fungus *Podospora anserina*. *Genetics*. 2002;161: 71–81. Available:  
858 <http://www.ncbi.nlm.nih.gov/pubmed/12019224>
- 859 56. Gibbons JG, Salichos L, Slot JC, Rinker DC, McGary KL, King JG, et al. The evolutionary  
860 imprint of domestication on genome variation and function of the filamentous fungus  
861 *Aspergillus oryzae*. *Curr Biol*. 2012;22: 1403–9. doi:10.1016/j.cub.2012.05.033
- 862 57. Zhang H, Rokas A, Slot JCJ. Two different secondary metabolism gene clusters occupied  
863 the same ancestral locus in fungal dermatophytes of the Arthrodermataceae. *PLoS One*.  
864 2012;7: e41903. doi:10.1371/journal.pone.0041903



- 865 58. Wiemann P, Guo C-J, Palmer JM, Sekonyela R, Wang CCC, Keller NP. Prototype of an  
866 intertwined secondary-metabolite supercluster. *Proc Natl Acad Sci U S A*. 2013;110:  
867 17065–70. doi:10.1073/pnas.1313258110
- 868 59. Syme RA, Hane JK, Friesen TL, Oliver RP. Resequencing and Comparative Genomics of  
869 *Stagonospora nodorum*: Sectional Gene Absence and Effector Discovery. *G3* & #58;  
870 Genes|Genomes|Genetics. 2013;3: 959–969. doi:10.1534/g3.112.004994
- 871 60. Chibucos MC, Crabtree J, Nagaraj S, Chaturvedi S, Chaturvedi V. Draft Genome  
872 Sequences of Human Pathogenic Fungus *Geomyces pannorum* Sensu Lato and Bat White  
873 Nose Syndrome Pathogen *Geomyces (Pseudogymnoascus) destructans*. *Genome*  
874 *Announc*. 2013;1: e01045-13-e01045-13. doi:10.1128/genomeA.01045-13
- 875 61. de Man TJB, Stajich JE, Kubicek CP, Teiling C, Chenthamara K, Atanasova L, et al. Small  
876 genome of the fungus *Escovopsis weberi*, a specialized disease agent of ant agriculture.  
877 *Proc Natl Acad Sci*. 2016;113: 3567–3572. doi:10.1073/pnas.1518501113
- 878 62. Wu W, Davis RW, Tran-Gyamfi MB, Kuo A, LaButti K, Mihaltcheva S, et al.  
879 Characterization of four endophytic fungi as potential consolidated bioprocessing hosts  
880 for conversion of lignocellulose into advanced biofuels. *Appl Microbiol Biotechnol*.  
881 Springer Berlin Heidelberg; 2017;101: 2603–2618. doi:10.1007/s00253-017-8091-1
- 882 63. de Vries RP, Riley R, Wiebenga A, Aguilar-Osorio G, Amillis S, Uchima CA, et al.  
883 Comparative genomics reveals high biological diversity and specific adaptations in the  
884 industrially and medically important fungal genus *Aspergillus*. *Genome Biol. BioMed*  
885 *Central*; 2017;18: 28. doi:10.1186/s13059-017-1151-0
- 886 64. Lin H-C, Chooi Y-H, Dhingra S, Xu W, Calvo AM, Tang Y. The Fumagillin Biosynthetic Gene  
887 Cluster in *Aspergillus fumigatus* Encodes a Cryptic Terpene Cyclase Involved in the  
888 Formation of  $\beta$ -trans-Bergamotene. *J Am Chem Soc*. 2013;135: 4616–9.  
889 doi:10.1021/ja312503y
- 890 65. Proctor RH, Van Hove F, Susca A, Stea G, Busman M, van der Lee T, et al. Birth, death and  
891 horizontal transfer of the fumonisin biosynthetic gene cluster during the evolutionary  
892 diversification of *Fusarium*. *Mol Microbiol*. 2013;90: 290–306. doi:10.1111/mmi.12362
- 893 66. Wong S, Wolfe KH. Birth of a metabolic gene cluster in yeast by adaptive gene relocation.  
894 *Nat Genet. Nature Publishing Group*; 2005;37: 777–782. doi:10.1038/ng1584
- 895 67. Khaldi N, Collemare J, Lebrun M-H, Wolfe KH. Evidence for horizontal transfer of a  
896 secondary metabolite gene cluster between fungi. *Genome Biol*. 2008;9: R18.  
897 doi:10.1186/gb-2008-9-1-r18
- 898 68. Wisecaver JH, Rokas A. Fungal metabolic gene clusters-caravans traveling across  
899 genomes and environments [Internet]. *Frontiers in Microbiology. Frontiers*; 2015. p. 161.  
900 doi:10.3389/fmicb.2015.00161

- 901 69. de Hoog G, Guarro J, Gené J, Figueras M. Atlas of Clinical Fungi. Washington, DC: ASM  
902 Press; 2001.
- 903 70. Liu D, Zhang R, Yang X, Wu H, Xu D, Tang Z, et al. Thermostable cellulase production of  
904 *Aspergillus fumigatus* Z5 under solid-state fermentation and its application in  
905 degradation of agricultural wastes. *Int Biodeterior Biodegradation*. 2011;65: 717–725.  
906 doi:10.1016/j.ibiod.2011.04.005
- 907 71. Li H, Durbin R. Fast and accurate short read alignment with Burrows-Wheeler transform.  
908 *Bioinformatics*. 2009;25: 1754–1760. doi:10.1093/bioinformatics/btp324
- 909 72. Quinlan AR, Hall IM. BEDTools: a flexible suite of utilities for comparing genomic  
910 features. *Bioinformatics*. Oxford University Press; 2010;26: 841–2.  
911 doi:10.1093/bioinformatics/btq033
- 912 73. McKenna A, Hanna M, Banks E, Sivachenko A, Cibulskis K, Kernytsky A, et al. The Genome  
913 Analysis Toolkit: a MapReduce framework for analyzing next-generation DNA sequencing  
914 data. *Genome Res*. Cold Spring Harbor Laboratory Press; 2010;20: 1297–303.  
915 doi:10.1101/gr.107524.110
- 916 74. Van der Auwera GA, Carneiro MO, Hartl C, Poplin R, del Angel G, Levy-Moonshine A, et  
917 al. From FastQ Data to High-Confidence Variant Calls: The Genome Analysis Toolkit Best  
918 Practices Pipeline. *Current Protocols in Bioinformatics*. Hoboken, NJ, USA: John Wiley &  
919 Sons, Inc.; 2013. p. 11.10.1-11.10.33. doi:10.1002/0471250953.bi1110s43
- 920 75. DePristo MA, Banks E, Poplin R, Garimella K V, Maguire JR, Hartl C, et al. A framework for  
921 variation discovery and genotyping using next-generation DNA sequencing data. *Nat*  
922 *Genet*. 2011;43: 491–498. doi:10.1038/ng.806
- 923 76. Cingolani P, Platts A, Wang LL, Coon M, Nguyen T, Wang L, et al. A program for  
924 annotating and predicting the effects of single nucleotide polymorphisms, SnpEff: SNPs in  
925 the genome of *Drosophila melanogaster* strain w1118; iso-2; iso-3. *Fly (Austin)*. Taylor &  
926 Francis; 2012;6: 80–92. doi:10.4161/fly.19695
- 927 77. Zhou X, Peris D, Kominek J, Kurtzman CP, Hittinger CT, Rokas A. in silico Whole Genome  
928 Sequencer & Analyzer (iWGS): A Computational Pipeline to Guide the Design and  
929 Analysis of de novo Genome Sequencing Studies. *G3* & #58;  
930 *Genes|Genomes|Genetics*. 2016; doi:10.1534/g3.116.034249
- 931 78. Bankevich A, Nurk S, Antipov D, Gurevich AA, Dvorkin M, Kulikov AS, et al. SPAdes: a new  
932 genome assembly algorithm and its applications to single-cell sequencing. *J Comput Biol*.  
933 Mary Ann Liebert, Inc.; 2012;19: 455–77. doi:10.1089/cmb.2012.0021
- 934 79. Zimin A V., Marçais G, Puiu D, Roberts M, Salzberg SL, Yorke JA. The MaSuRCA genome  
935 assembler. *Bioinformatics*. 2013;29: 2669–2677. doi:10.1093/bioinformatics/btt476
- 936 80. Gurevich A, Saveliev V, Vyahhi N, Tesler G. QUASt: quality assessment tool for genome

- 937 assemblies. *Bioinformatics*. 2013;29: 1072–1075. doi:10.1093/bioinformatics/btt086
- 938 81. Stanke M, Morgenstern B. AUGUSTUS: a web server for gene prediction in eukaryotes  
939 that allows user-defined constraints. *Nucleic Acids Res. Oxford University Press*; 2005;33:  
940 W465-7. doi:10.1093/nar/gki458
- 941 82. Smit A, Hubley R, Green P. Repeatmasker Open-4.0 [Internet]. Available:  
942 <http://www.repeatmasker.org>
- 943 83. Inglis DO, Binkley J, Skrzypek MS, Arnaud MB, Cerqueira GC, Shah P, et al.  
944 Comprehensive annotation of secondary metabolite biosynthetic genes and gene  
945 clusters of *Aspergillus nidulans*, *A. fumigatus*, *A. niger* and *A. oryzae*. *BMC Microbiol.*  
946 2013;13: 91. doi:10.1186/1471-2180-13-91
- 947 84. Bignell E, Cairns TC, Throckmorton K, Nierman WC, Keller NP. Secondary metabolite  
948 arsenal of an opportunistic pathogenic fungus. *Philos Trans R Soc B Biol Sci*. 2016;371.
- 949 85. Medema MH, Blin K, Cimermancic P, de Jager V, Zakrzewski P, Fischbach M a, et al.  
950 antiSMASH: rapid identification, annotation and analysis of secondary metabolite  
951 biosynthesis gene clusters in bacterial and fungal genome sequences. *Nucleic Acids Res.*  
952 2011;39: W339-46. doi:10.1093/nar/gkr466
- 953 86. Stamatakis A. RAxML version 8: a tool for phylogenetic analysis and post-analysis of large  
954 phylogenies. *Bioinformatics*. 2014;30: 1312–1313. doi:10.1093/bioinformatics/btu033
- 955 87. Zheng X, Levine D, Shen J, Gogarten SM, Laurie C, Weir BS. A high-performance  
956 computing toolset for relatedness and principal component analysis of SNP data.  
957 *Bioinformatics*. Oxford University Press; 2012;28: 3326–3328.  
958 doi:10.1093/bioinformatics/bts606
- 959 88. Letunic I, Bork P. Interactive tree of life (iTOL) v3: an online tool for the display and  
960 annotation of phylogenetic and other trees. *Nucleic Acids Res*. 2016;44: W242–W245.  
961 doi:10.1093/nar/gkw290
- 962 89. Eddy SR. A new generation of homology search tools based on probabilistic inference.  
963 *Genome Inform*. 2009;23: 205–11. Available:  
964 <http://www.ncbi.nlm.nih.gov/pubmed/20180275>
- 965 90. Katoh K, Standley DM. MAFFT Multiple Sequence Alignment Software Version 7:  
966 Improvements in Performance and Usability. *Mol Biol Evol*. 2013;30: 772–780.  
967 doi:10.1093/molbev/mst010
- 968 91. Capella-Gutierrez S, Silla-Martinez JM, Gabaldon T. trimAl: a tool for automated  
969 alignment trimming in large-scale phylogenetic analyses. *Bioinformatics*. 2009;25: 1972–  
970 1973. doi:10.1093/bioinformatics/btp348
- 971 92. Paradis E, Claude J, Strimmer K. APE: Analyses of Phylogenetics and Evolution in R  
972 language. *Bioinformatics*. Oxford University Press; 2004;20: 289–290.

973 doi:10.1093/bioinformatics/btg412

974 93. Schliep KP. phangorn: phylogenetic analysis in R. Bioinformatics. Oxford University Press;  
975 2011;27: 592–3. doi:10.1093/bioinformatics/btq706

976 94. Shimizu K, Keller NP. Genetic involvement of a cAMP-dependent protein kinase in a G  
977 protein signaling pathway regulating morphological and chemical transitions in  
978 *Aspergillus nidulans*. Genetics. 2001;157: 591–600. Available:  
979 <http://www.ncbi.nlm.nih.gov/pubmed/11156981>

980 95. Melamud E, Vastag L, Rabinowitz JD. Metabolomic Analysis and Visualization Engine for  
981 LC–MS Data. Anal Chem. 2010;82: 9818–9826. doi:10.1021/ac1021166

982 96. Ahn JH, Walton JD. Chromosomal organization of TOX2, a complex locus controlling host-  
983 selective toxin biosynthesis in *Cochliobolus carbonum*. Plant Cell. American Society of  
984 Plant Biologists; 1996;8: 887–97. doi:10.1105/tpc.8.5.887

985

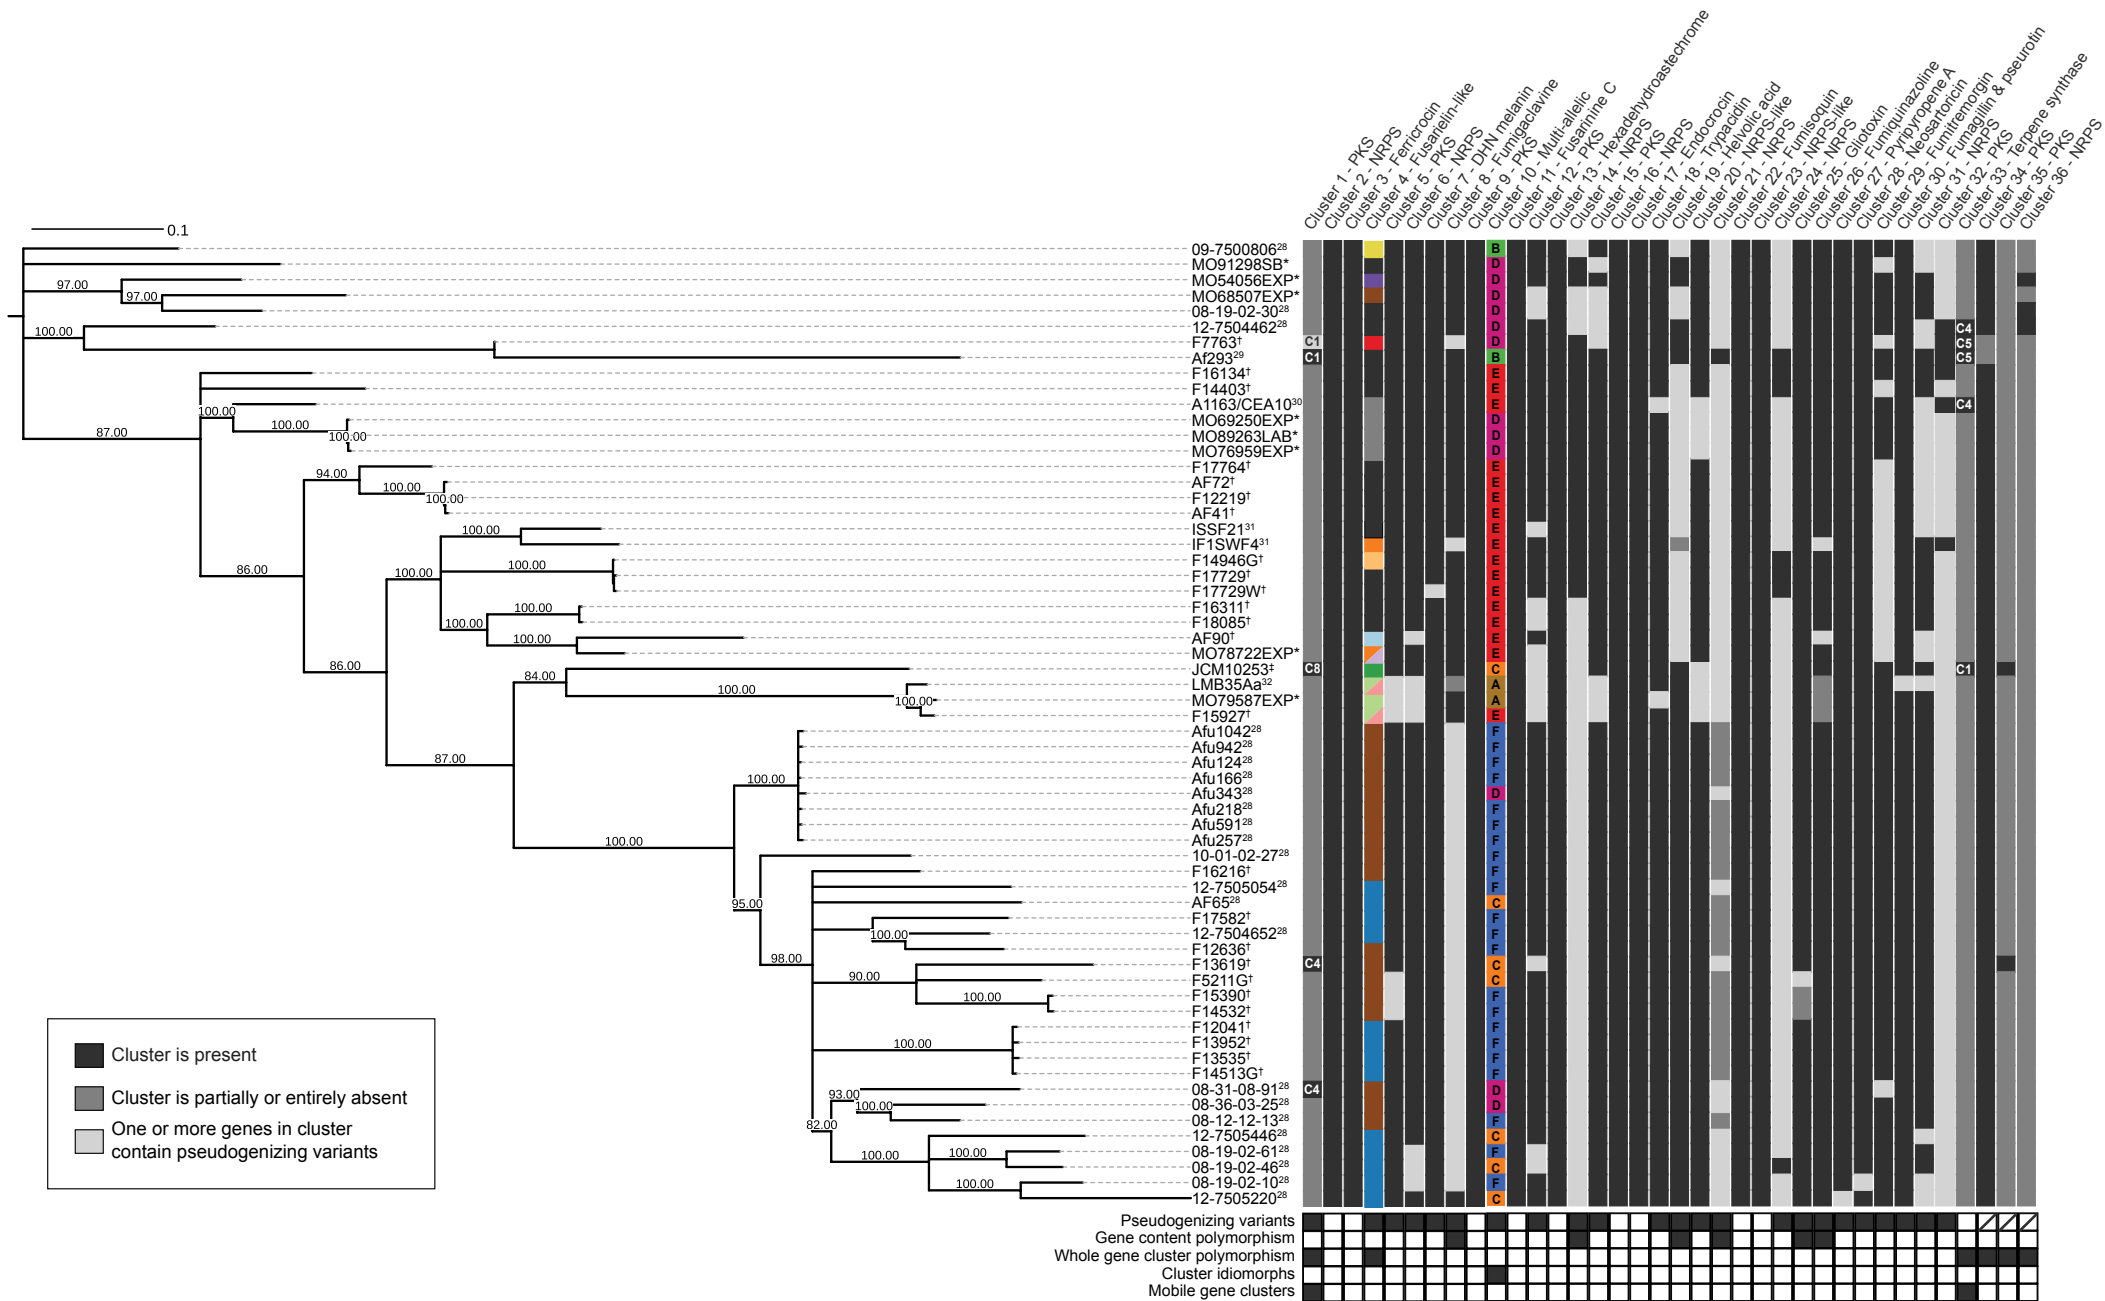

**Figure 1. Genetic diversity of secondary metabolic gene clusters within a fungal species.** The phylogeny was constructed using 15,274 biallelic SNPs with no missing data. The tree is midpoint rooted and all branches with bootstrap support less than 80% are collapsed. This phylogeny does not include strains Af10, Af210, Z5, or RP-2014 as short read data were not available. Superfixes following strain names indicate publications associated with DNA sequencing. \* indicates strains sequenced in this study, † indicates strains sequenced at JCVI with no associated publication, and ‡ indicates strains sequenced by RIKEN with no associated publications. Heatmaps show presence, absence and polymorphisms in SM gene clusters. Black indicates the cluster is present in a strain with no polymorphisms aside from missense variants, light gray indicates one or more genes in the cluster are pseudogenized, and dark gray indicates the cluster is partially or entirely absent. Colors for Cluster 4 indicate which pseudogenizing variants are present (see Figure 3) and colors for Cluster 10 indicate which allele of the cluster is present (see Figure 4). Chromosomal location of Clusters 1 and 33 are indicated. If more than one type of polymorphism is present within a cluster in a strain, only one is depicted. Types of polymorphisms found in each cluster are summarized below the cluster heatmap.

**A**

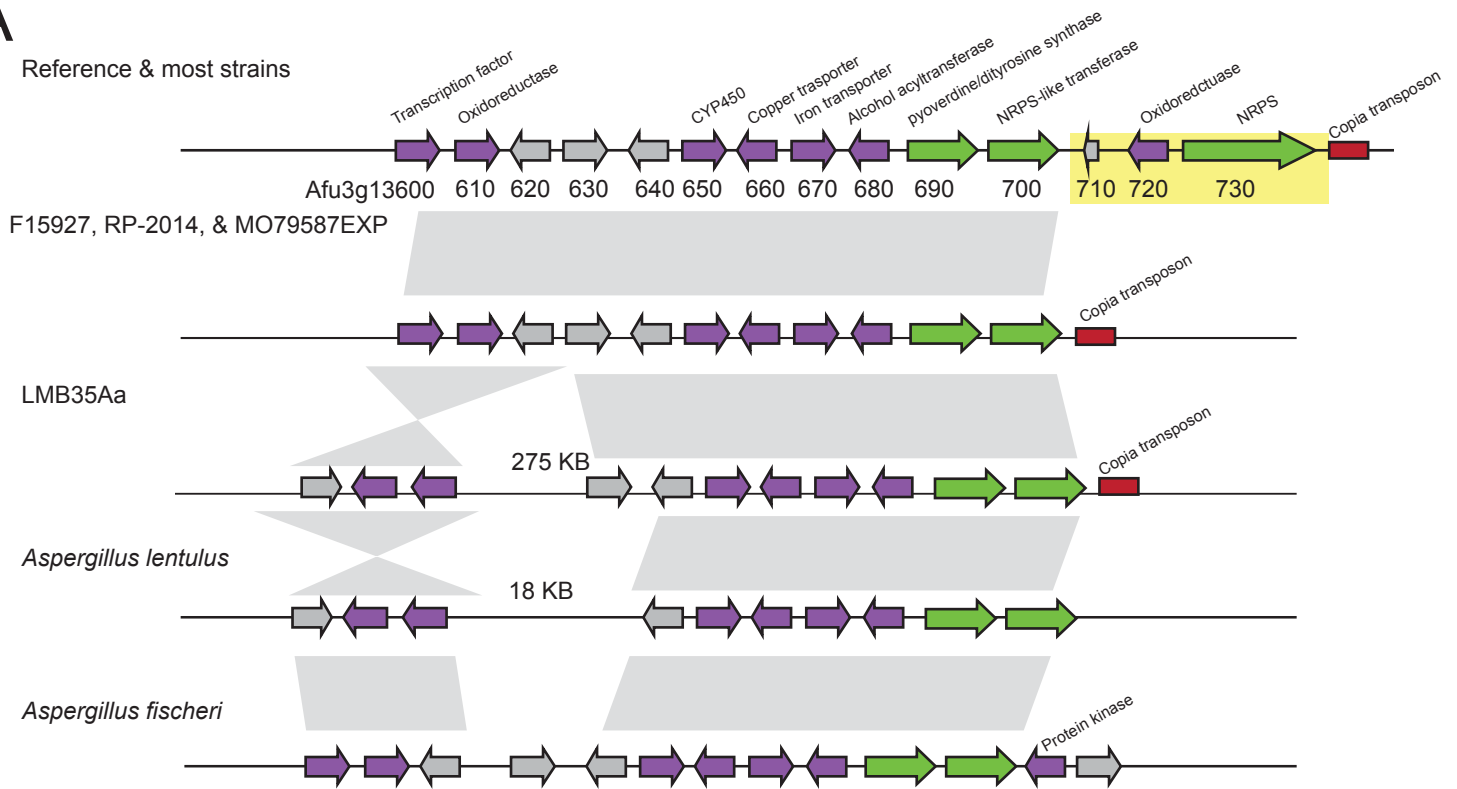

**B**

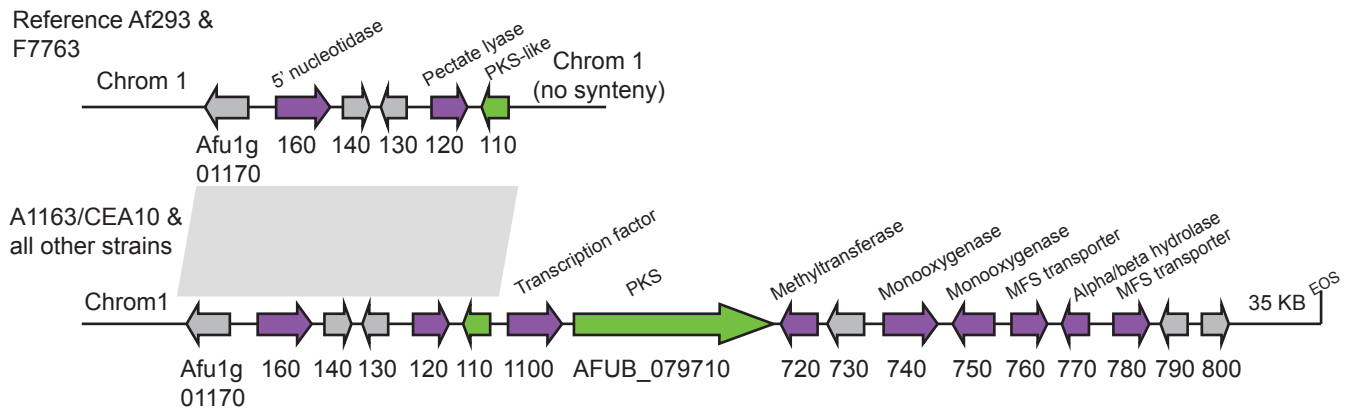

**Figure 2. Gene gains and deletions in SM gene clusters.** (A) Differences in gene content in SM gene cluster 14 in *A. fumigatus* strains and closely related species. Four *A. fumigatus* strains lack an 11-Kb region in this cluster, including an NRPS backbone gene, highlighted in yellow. Regions upstream and downstream of this cluster are syntenic. LMB35Aa also contains a large inversion that moves a transcription factor, oxidoreductase, and hypothetical protein 275 kb away from the cluster. *Aspergillus fischeri* and *Aspergillus lentulus*, close relatives of *A. fumigatus*, contain a cluster lacking the 11-kb region. (B) SM gene cluster found in most *A. fumigatus* strains but absent from the Af293 reference and from the F7763 strain. EOS denotes end of scaffold.

A

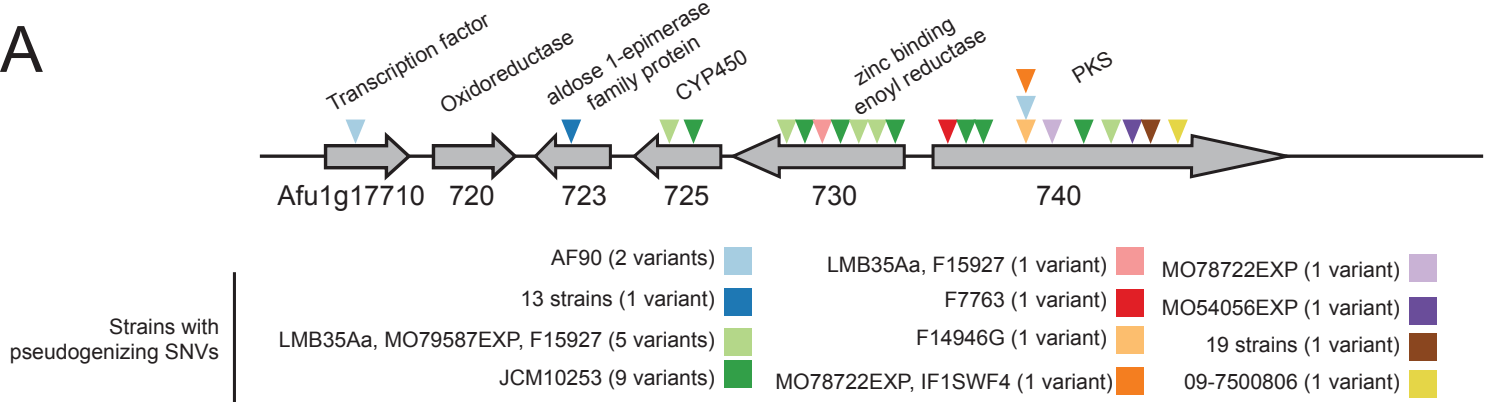

B

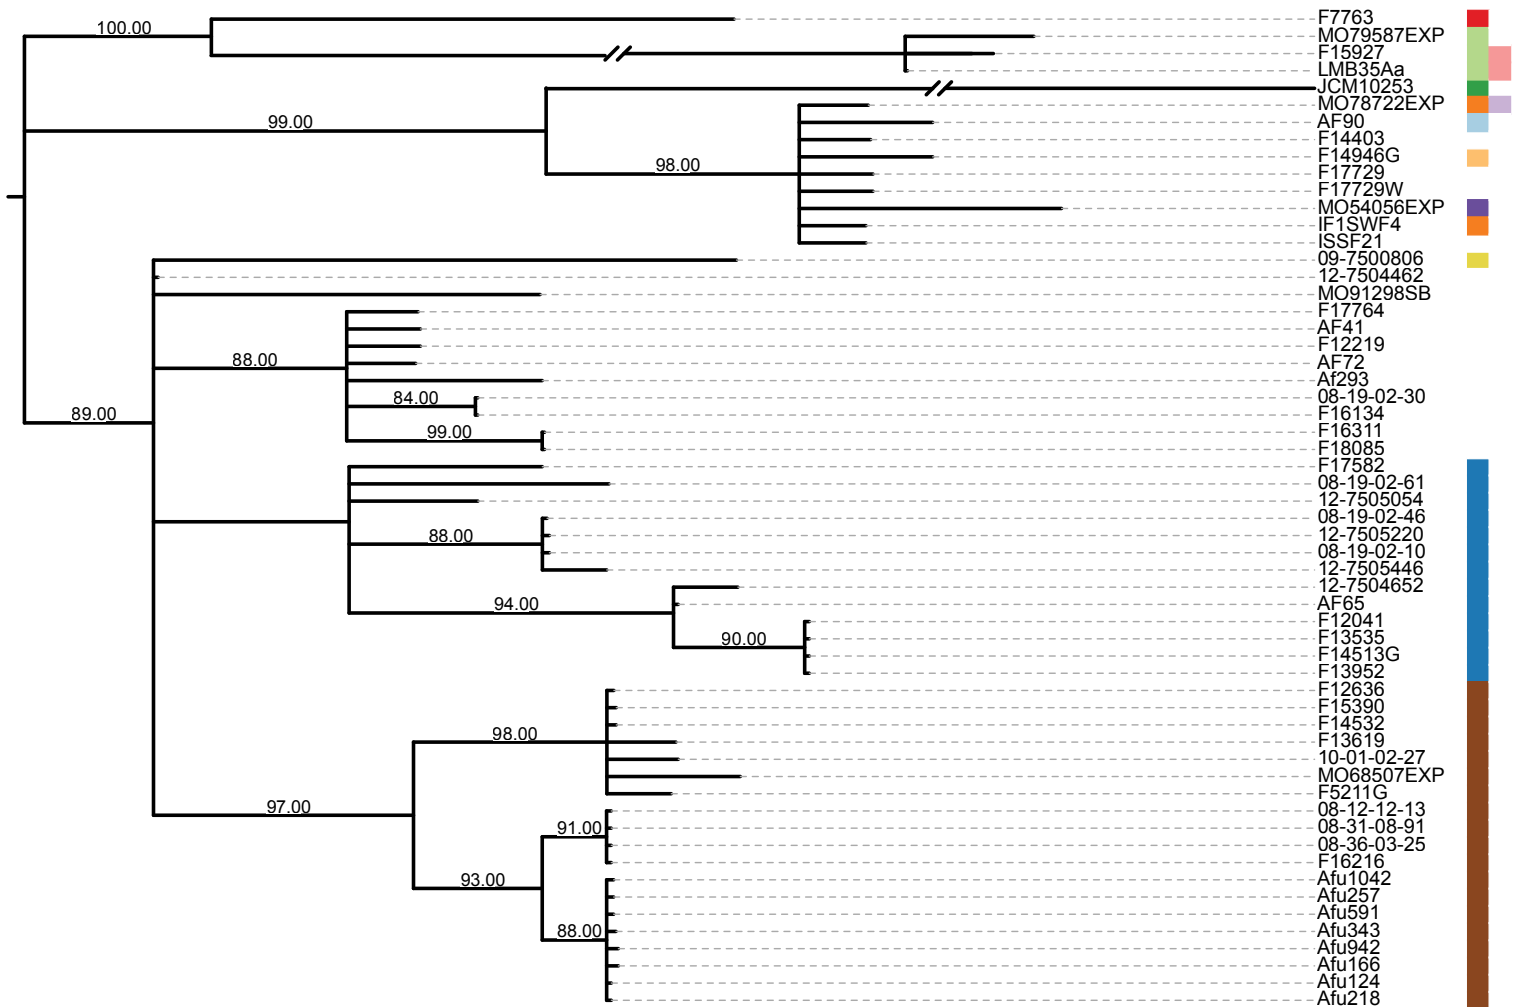

**Figure 3. Pseudogenization in the fusarielin-like SM gene cluster.** (A) Positions of frameshift variants and nonsense variants in the fusarielin-like SM gene cluster 4. (B) Locus phylogeny of the fusarielin-like SM gene cluster based on a nucleotide alignment of the entire gene cluster including intergenic and non-coding regions. The phylogeny is midpoint rooted and branches with bootstrap support <80% are collapsed. Two branches were shortened for visualization purposes. Strains with pseudogenizing variants are indicated with colored boxes. Colors correspond to variants shown in (A).

A

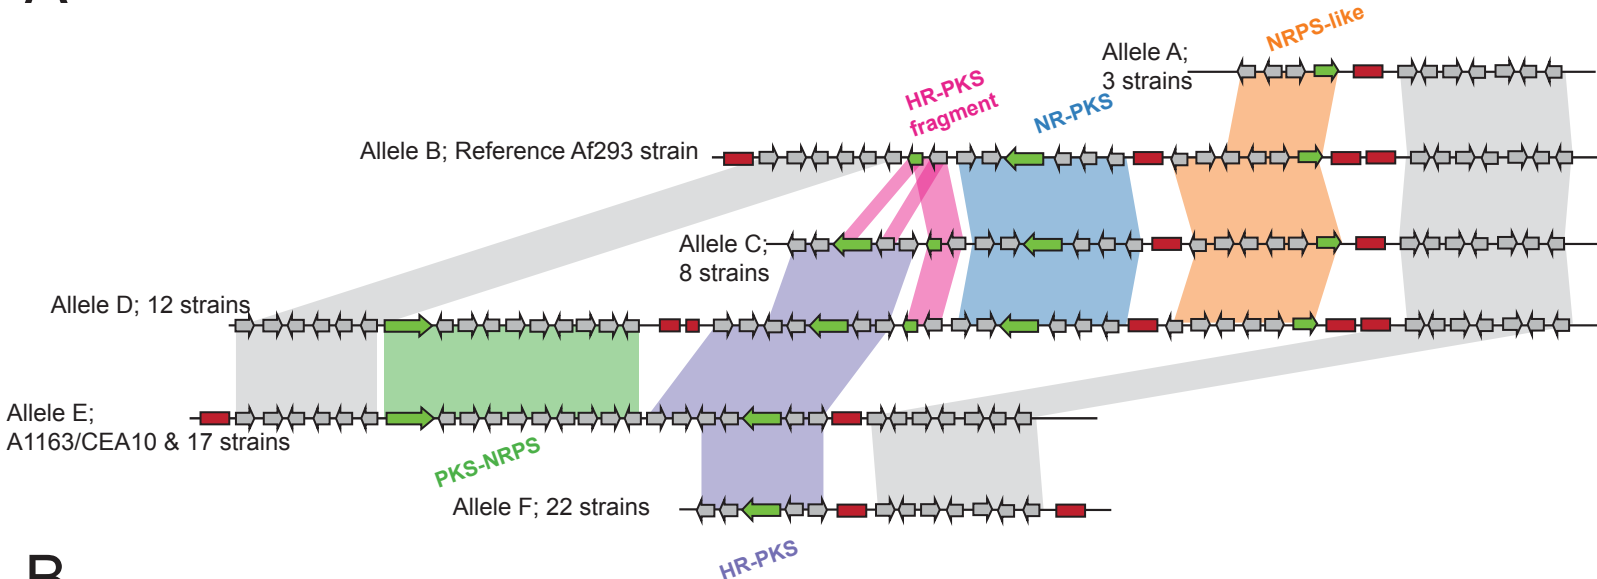

B

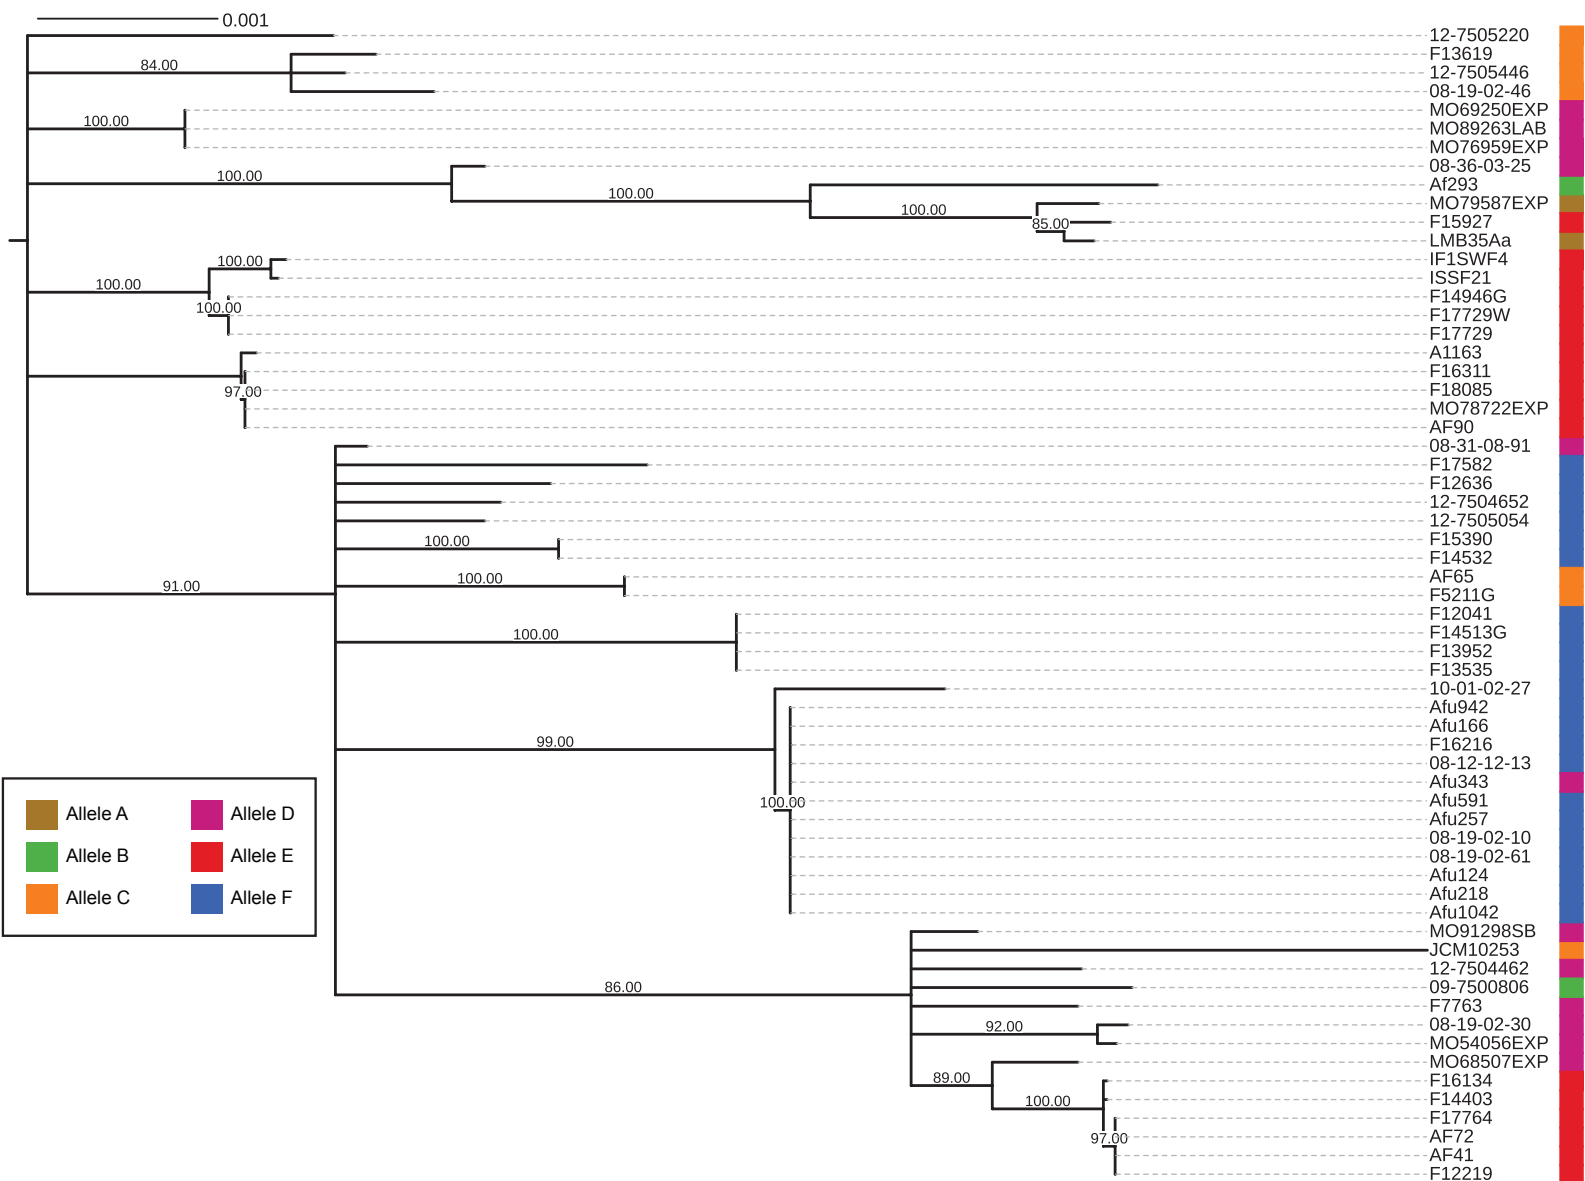

**Figure 4. Six alleles of an idiomorphic SM gene cluster.** (A) Alleles of SM gene cluster 10 on chromosome 3. Red boxes denote transposable elements. Green arrows denote backbone genes (PKS or NRPS). (B) Locus phylogeny of conserved downstream of the idiomorph cluster (highlighted in gray in A). Phylogeny was constructed using a 48 MB nucleotide alignment with the GTRGAMMA model and midpoint rooted. Branches with bootstrap support < 80% were collapsed.



A

Af293 & F7763

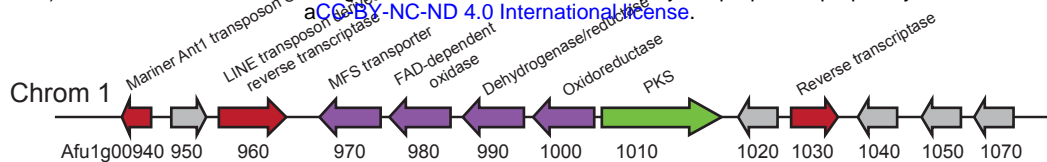

08-31-08-91, Z5 & F13619

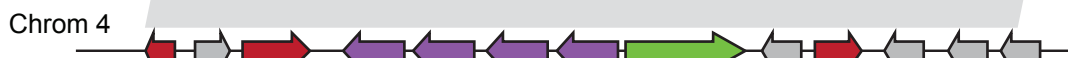

JCM10253

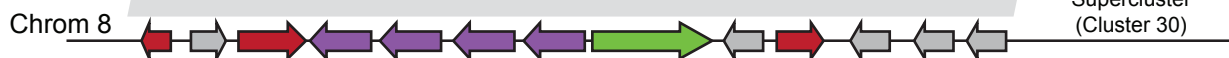

B

*Aspergillus fumigatus* Af293

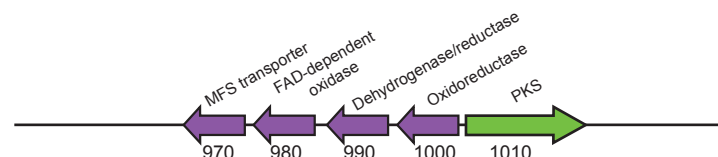

*Phaeosphaeria nodorum* SN15  
class Dothideomycete

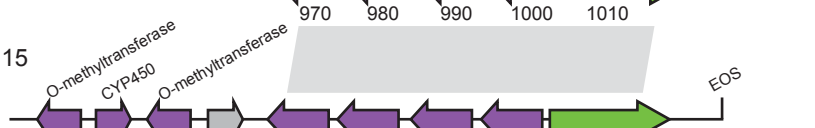

*Pseudogymnoascus pannorum*  
class Leotiomycete

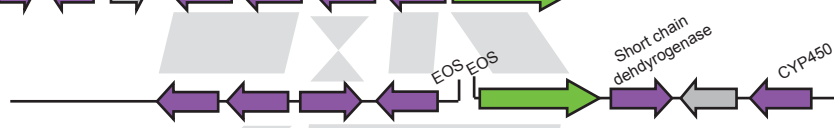

*Escovopsis weberi*  
class Sordariomycete

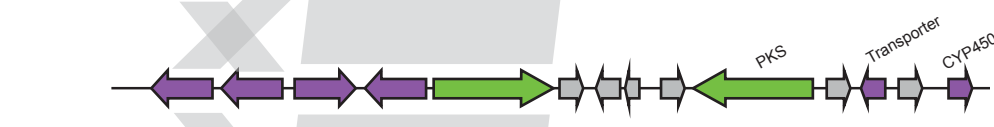

*Hypoxylon* sp. C14A  
class Sordariomycete

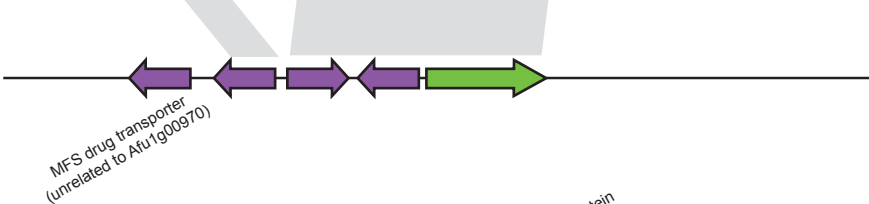

C

Reference Af293 & F7763

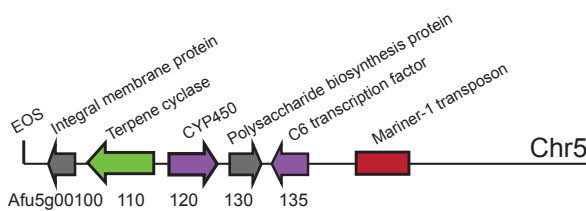

A1163/CEA10 & 12-7504462

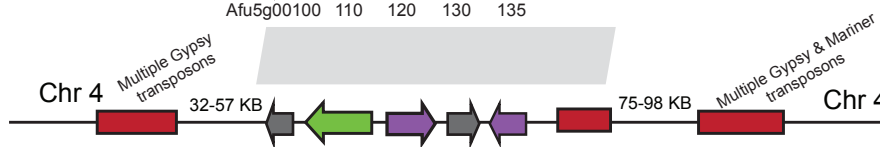

JCM10253

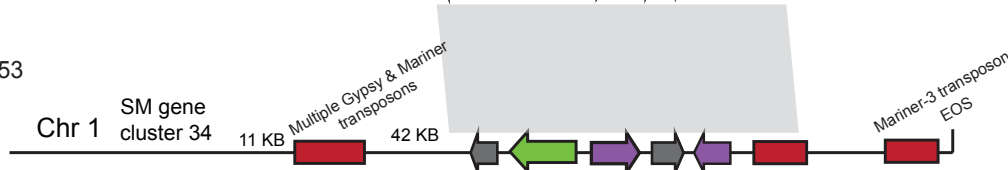

**Figure 5. Multiple genomic locations of two SM gene clusters.** (A) SM gene cluster 1 (Afu1g00970-01010) and flanking region is found in different genomic locations. The flanking regions contain transposon-derived open reading frames including two putative reverse transcriptases. In one strain, SM gene cluster 1 is found adjacent to SM gene cluster 30. (B) Synteny of *A. fumigatus* SM gene cluster 1 with clusters in *Phaeosphaeria nodorum*, *Pseudogymnoascus pannorum*, *Escovopsis weberi*, and *Hypoxylon* sp. C14A. EOS denotes end of scaffold. All species contain non-syntenic genes predicted by antiSMASH to be part of a biosynthetic gene cluster. (C) SM gene cluster 33 (Afu5g00100-00135) is found in different genomic locations in different strains. In one strain, the cluster is adjacent to SM gene cluster 34. Multiple transposable elements flank the cluster in each strain.

# High frequency polymorphisms

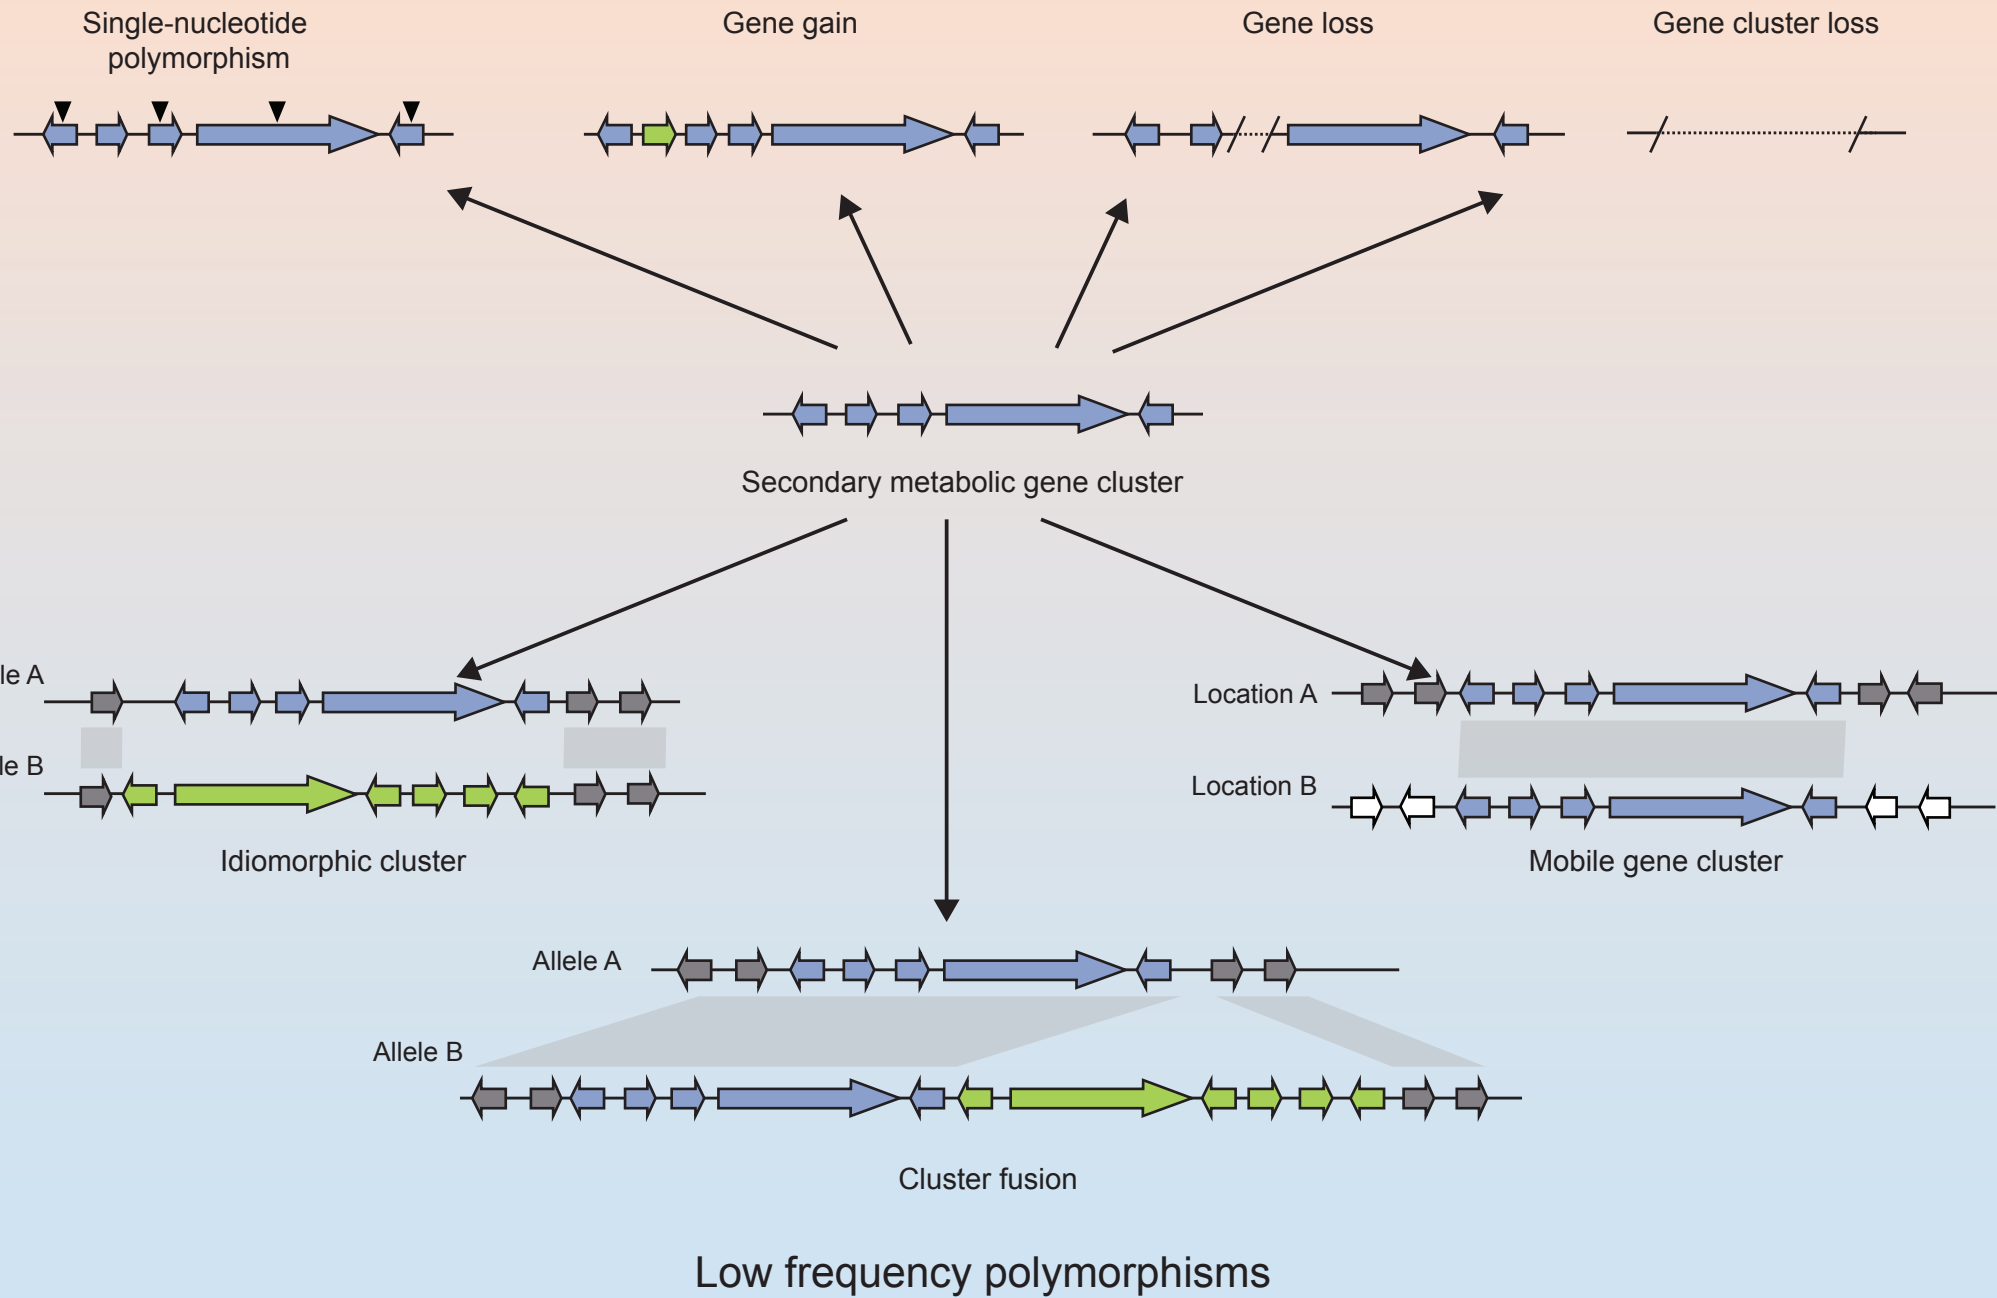

Figure 6. Types and frequencies of all SM gene cluster variants within *A. fumigatus*.
